1 ***De novo* stem cell establishment in meristems requires repression of organ**  
2 **boundary cell fate**

3

4 **Antoine Nicolas<sup>1,2</sup>, Aude Maugarny-Calès<sup>1,2</sup>, Bernard Adroher<sup>1</sup>, Liudmila Chelysheva<sup>1</sup>, Yu Li<sup>3</sup>,**  
5 **Jasmine Burguet<sup>1</sup>, Anne-Maarit Bågman<sup>4</sup>, Margot E. Smit<sup>4</sup>, Siobhan M. Brady<sup>4</sup>, Yunhai Li<sup>3</sup>,**  
6 **Patrick Laufs<sup>1</sup>**

7

8 <sup>1</sup> Université Paris-Saclay, INRAE, AgroParisTech, Institut Jean-Pierre Bourgin (IJPB), 78000,  
9 Versailles, France.

10 <sup>2</sup> Université Paris-Saclay, 91405 Orsay, France

11 <sup>3</sup> State Key Laboratory of Plant Cell and Chromosome Engineering, Institute of Genetics and  
12 Developmental Biology, Chinese Academy of Sciences, Beijing 100101, China

13 <sup>4</sup> Department of Plant Biology and Genome Center, University of California, Davis, Davis CA  
14 95616 USA

15

16

17 **ABSTRACT**

18 Stem cells play important roles in animal and plant biology as they sustain morphogenesis  
19 and tissue replenishment following aging or injuries. In plants, stem cells are embedded in  
20 multicellular structures called meristems and the formation of new meristems is essential for  
21 the plastic expansion of the highly branched shoot and root systems. In particular, axillary  
22 meristems that produce lateral shoots arise from the division of boundary domain cells at the  
23 leaf base. The *CUP-SHAPED COTYLEDON (CUC)* genes are major determinants of the boundary  
24 domain and are required for axillary meristem initiation. However, how axillary meristems get  
25 structured and how stem cells become established *de novo* remains elusive. Here, we show  
26 that two NGATHA-LIKE transcription factors, *DPA4* and *SOD7*, redundantly repress *CUC*  
27 expression in the initiating axillary meristem. Ectopic boundary fate leads to abnormal growth  
28 and organisation of the axillary meristem and prevents *de novo* stem cell establishment. Floral  
29 meristems of the *dpa4 sod7* double mutant show a similar delay in stem cell *de novo*  
30 establishment. Altogether, while boundary fate is required for the initiation of axillary  
31 meristems, our work reveals how it is later repressed to allow proper meristem establishment  
32 and *de novo* stem cell niche formation.

33

34

## 35 INTRODUCTION

36 Stem cells play a central role in animal and plant biology as they are the source of all  
37 cells that form organs and tissues during morphogenesis and allow cells to be replaced  
38 following injuries or at the end of their life cycle (Baurle and Laux, 2003; Birnbaum and  
39 Alvarado, 2008; Morrison and Spradling, 2008). In both animals and plants, stem cells are  
40 maintained in their undifferentiated and pluripotent state through interactions with a  
41 microenvironment that forms a niche (Comazzetto et al., 2021; Dinneny and Benfey, 2008;  
42 Janocha and Lohmann, 2018; Pardal and Heidstra, 2021; Xie and Spradling, 2000). However,  
43 in contrast to what occurs in animals, plant stem cells cannot move and, as a consequence,  
44 stem cell niches have to be formed *de novo* in plants (Laird et al., 2008). Indeed, *de novo* stem  
45 cell establishment is essential to support the formation of new growth axes (shoots or roots)  
46 that allows plants to plastically expand their shape enabling them to explore their  
47 environment.

48 In plants, stem cells and niches are embedded in multicellular structures called  
49 meristems. The shoot apical meristem (SAM), formed during embryogenesis, is the direct  
50 source of the main shoot, forming stem and leaves after germination (Long et al., 1996). The  
51 SAM is a dynamic, yet organized structure that is maintained through interactions between  
52 its different domains. In the apical part of the SAM lies a group of semi-permanent stem cells  
53 maintained by an underlying organizing centre (OC) that contributes to the stem cell niche  
54 function (Laux et al., 1996). The OC expresses the WUSCHEL (WUS) transcription factor that  
55 travels through cellular connections to the overlying layers to induce stem cell fate (Daum et  
56 al., 2014; Mayer et al., 1998; Perales et al., 2016; Sloan et al., 2020; Yadav et al., 2011). In  
57 turn, stem cells express the excreted CLAVATA3 (CLV3) peptide that through interaction with  
58 different receptor kinases including CLAVATA1 (CLV1) feedbacks to repress *WUS* activity in

59 the OC (Brand et al., 2000; Fletcher et al., 1999; Müller et al., 2008; Schlegel et al., 2021;  
60 Schoof et al., 2000). On this core *WUS/CLV* regulatory feedback circuit are grafted additional  
61 interacting regulators such as auxin and cytokinin signals or the HAIRY MERISTEM (HAM)  
62 transcription factors and their regulatory miRNA, miR171 (Chickarmane et al., 2012; Gruel et  
63 al., 2016; Han et al., 2020a; Leibfried et al., 2005; Ma et al., 2019; Zhou et al., 2015).  
64 Altogether, this network contributes to proper spatial positioning of the stem cell and stem  
65 cell niche and their fine tuning to allow meristem activity to respond to environmental signals  
66 (Landrein et al., 2018; Pfeiffer et al., 2016; Yoshida et al., 2011).

67         On the flanks of the meristem, new organ primordia are initiated following a spatial  
68 and temporal pattern that is orchestrated by auxin and cytokinin signaling (Besnard et al.,  
69 2014; Reinhardt et al., 2003). Proper initiation and separation of the organ primordia requires  
70 the establishment of an organ boundary domain by multiple factors in which the *CUP-SHAPED*  
71 *COTYLEDON (CUC)* genes play a prominent role (Aida and Tasaka, 2006; Žádníková et al.,  
72 2014). This domain separates the leaf primordium from the meristem and will later give rise  
73 to the axillary region that lies on the inner base of the leaf. Multiple factors allow coordinating  
74 primordium initiation with stem cell activities. For instance, the *CUC* genes are both required  
75 for organ formation and meristem maintenance (Aida et al., 1997), the HD-ZIP III transcription  
76 factors contribute to leaf polarity and meristem function (Caggiano et al., 2017; Kim et al.,  
77 2008), and auxin and cytokinins are regulating both organ initiation and stem cell activity  
78 (Besnard et al., 2014; Chickarmane et al., 2012; Ma et al., 2019; Reinhardt et al., 2003).

79         While the root and shoot apical meristems formed during embryogenesis are  
80 generating respectively the primary root and the main shoot, the ramified architectures of  
81 the shoot and root systems result from the activity of meristems newly formed during post-  
82 embryonic development. These lateral root and shoot meristems arise from a group of

83 dividing cells originating respectively from the root pericycle layer or the leaf axillary region  
84 and acquire an organization and activity similar to the primary embryonic meristems,  
85 including a *de novo* established stem cell population and niche.

86         The formation of an axillary meristem (AM) between the developing leaf primordia  
87 and the SAM can be divided into three steps: the maintenance of a few meristematic cells at  
88 the leaf axil, the expansion of this cell population and the establishment of a functional  
89 meristem (Cao and Jiao, 2020; Wang and Jiao, 2018; Wang et al., 2016). Multiple factors  
90 regulating these events have been characterized during the formation of the AM formed in  
91 the rosette leaves of *Arabidopsis thaliana*. During the maintenance phase, a small group of  
92 cells located at the base of the developing leaf retains meristematic features while  
93 neighboring cells differentiate (Grbic and Bleecker, 2000; Long and Barton, 2000). Expression  
94 of the meristematic gene *SHOOT MERISTEMLESS (STM)* and the boundary domain genes *CUC2*  
95 and *CUC3* in these cells is required for AM initiation and, accordingly, *stm*, *cuc2* or *cuc3*  
96 mutants show defective AM formation (Grbic and Bleecker, 2000; Hibara et al., 2006; Long  
97 and Barton, 2000; Raman et al., 2008; Shi et al., 2016). Maintenance of *STM* expression  
98 requires auxin depletion from the axillary region by polar auxin transport (Wang et al., 2014a,  
99 2014b) and involves at the molecular level a self-activation loop facilitated by a permissive  
100 epigenetic environment (Cao et al., 2020). These cells can remain latent during a long period  
101 of time and, upon receiving proper environmental or endogenous signals, switch to the  
102 activation phase during which their number rapidly increases by cell divisions to generate a  
103 small bulge. A strong increase in *STM* expression level is instrumental for the switch to the  
104 activation phase (Shi et al., 2016) and multiple transcription factors, such as *REVOLUTA*,  
105 *DORNRÖSCHEN*, *DORNRÖSCHEN LIKE*, *REGULATOR OF AXILLARY MERISTEMS1, 2 and 3* and  
106 *REGULATOR OF AXILLARY MERISTEM FORMATION* provide spatial and temporal cues for the

107 local activation of *STM* expression (Greb et al., 2003; Keller et al., 2006; Müller et al., 2006;  
108 Raman et al., 2008; Shi et al., 2016; Yang et al., 2012; Zhang et al., 2018). Furthermore, a local  
109 pulse of cytokinin signalling reinforces *STM* expression to promote the formation of the AM,  
110 possibly through a mutual positive feedback loop between *STM* and cytokinins (Wang et al.,  
111 2014b).

112         During the establishment phase, the bulge acquires progressively a typical meristem  
113 organization with functional sub-domains. Cytokinins promote *de novo* *WUS* expression, thus  
114 defining the OC (Wang et al., 2017). For this, the type-B Arabidopsis response regulator  
115 proteins (ARRs), which mediate the transcriptional response to cytokinin, directly bind to the  
116 *WUS* promoter. In turn, *WUS* expression initiates the activation of the stem cell population  
117 marked by the expression of the *CLV3* gene (Xin et al., 2017). Interestingly, during the initial  
118 phase of *WUS* and *CLV3* activation both genes are expressed in overlapping domains in  
119 internal layers of the AM and they only later discriminate into their proper expression  
120 patterns with *CLV3* expression shifting to the upper layers (Xin et al., 2017). This spatial  
121 rearrangement of *CLV3* expression requires an apical-basal gradient of *HAM* genes activities  
122 that results in part from the epidermis-specific expression of their negative regulators miR171  
123 (Han et al., 2020a, 2020b; Zhou et al., 2018). Therefore, AM establishment is a gradual  
124 process, during which the expanding population of meristematic cells acquires specific  
125 identities including the specification of apical stem cells and an underlying stem cell niche  
126 combined with organ boundary domains at the meristem flanks.

127         Arabidopsis floral meristems are proposed to be modified AMs in which the  
128 subtending leaf is replaced by a cryptic bract whose development is suppressed (Long and  
129 Barton, 2000). Floral meristems also establish *de novo* a stem cell population marked by a  
130 rapid activation of *WUS* expression in stage 1 floral meristems (Mayer et al., 1998) and by

131 *CLV3* expression by late stage 2 (Seeliger et al., 2016). However, in contrast to AM, in which  
132 stem cells are maintained, floral meristems are determined structures with only a transient  
133 maintenance of stem cells. Indeed, the C-class floral gene *AGAMOUS* directly repress *WUS* by  
134 recruiting the Polycomb Repressive Complex 1 factor TERMINAL FLOWER 2 and induces  
135 KNUCKLES which in turn represses *WUS* and interferes with *WUS*-mediated *CLV3* activation  
136 (Lenhard et al., 2001; Liu et al., 2011; Shang et al., 2021; Sun et al., 2014).

137         Thus, it appears that while the molecular mechanisms allowing the preservation and  
138 the amplification of a pool of meristematic cells leading to AM emergence start to be  
139 deciphered, how the newly meristem becomes organized and activated remains far less  
140 understood. Here, we analyse AM establishment, concentrating on cauline AMs (CaAMs) that  
141 are poorly characterized compared to rosette AMs (RoAMs). We show that CaAMs are rapidly  
142 formed following floral induction and that this is associated with dynamic changes in gene  
143 expression. Accordingly, while the *CUC* genes are required for the maintenance and activation  
144 phase, they have to be cleared for meristem establishment and activation of the stem cell  
145 population. Indeed, ectopic expression of the *CUC* boundary genes leads to asynchronous AM  
146 development and delayed *de novo* stem cell formation. We provide a molecular mechanism  
147 for this dynamic regulation of the *CUC* genes by two members of the NGATHA-like (NGAL)  
148 family of transcriptional repressors. A similar delay in *de novo* stem cell establishment is  
149 observed during floral meristem formation. Altogether, we reveal a genetic circuit repressing  
150 boundary cell fate that is required for *de novo* stem cell formation.

151

152 **RESULTS**

153 Dynamic gene expression accompanies cauline AM establishment.

154 CaAMs are rapidly formed and grow out following floral transition (Burian et al., 2016;  
155 Grbic and Bleecker, 2000; Hempel and Feldman, 1994). To provide a framework for CaAM  
156 formation in Arabidopsis, we analysed morphological changes in calcofluor-stained samples  
157 and gene expression dynamics using reporter lines in the leaf axillary region following plant  
158 shifting from short-day (SD) to long-day (LD) conditions (Fig. 1). Six days after shifting to LD  
159 (6LD), the cauline leaf primordium was separated from the main meristem by a boundary  
160 containing small and narrow cells (Fig. 1A). At 8LD, a bulge emerged between the cauline leaf  
161 primordium and the i, defining the “dome stage” of the developing AM (Fig. 1B). At 10LD and  
162 13LD leaf and flower primordia were formed by the AM (Fig. 1C,D), defining respectively the  
163 “leaf primordium” and “flower primordium” stages.

164 To trace back the formation of the organizing centre and stem cells during CaAM  
165 establishment, we first analysed the expression dynamics of *WUSCHEL* and *CLAVATA3*  
166 transcriptional reporters (Pfeiffer et al., 2016). At 5LD, pWUS:3xVENUS-NLS expression  
167 appeared in a few cells in of P7, the 7<sup>th</sup> youngest visible primordia (Fig. 1E). The number of  
168 VENUS expressing cells progressively increased during later stages (Fig. 1F-H).  
169 pCLV3:mCHERRY-NLS expression appeared only later: some CaAMs started to express *CLV3*  
170 at 7LD while at 8 LD most of them expressed *CLV3* (Fig.1 I-L). Longitudinal optical sections  
171 showed that at 7LD *WUS* expression expanded from the corpus into the L2 and sometimes L1  
172 layer (Fig. 1F). Concomitant with the onset of *CLV3* expression (Fig. 1L), *WUS* expression  
173 became progressively excluded from the 3 outermost layers to finally mimic the expression  
174 observed in the SAM (Fig. 1H). Therefore, as in the RoAMs, during *de novo* establishment of  
175 the stem cell niche in CaAM, *WUS* is first activated, while *CLV3* is expressed later in a domain



176 contained in the WUS-expressing cells. These two overlapping domains then resolve into an  
177 apical *CLV3* domain and a central *WUS* domain. However, whereas in the RoAMs, *CLV3*  
178 showed a dynamic shift from a central to an apical domain (Xin et al., 2017) (Fig. S1), in CaAMs,  
179 the *WUS* domain shifted from an apical to a central domain.

180         Next, we followed the dynamics of *CUC2* and *CUC3* expression as these genes are  
181 redundantly required for CaAM formation (Hibara et al., 2006; Raman et al., 2008). During  
182 the early stages (P1 to P6), pCUC2:erRFP and pCUC3er:CFP transcriptional reporters showed  
183 a compact domain of expression at the boundary between the cauline leaf primordia and the  
184 meristem (Fig. 1M,Q). These expression domains became progressively more elongated while  
185 the groove separating the primordium from the meristem formed (P5-P6, Fig. 1N,R). Such  
186 *CUC2* and *CUC3* expression dynamics were independent of CaAM formation as they were  
187 observed in apices of both plants shifted or not shifted to LD. However, while in non-induced  
188 plants, expression of *CUC2* and *CUC3* remained as a compact line, we observed that starting  
189 5LD onwards, it split into an eye-shaped structure leaving a central region with reduced  
190 expression in P7-P8 primordia (Fig. 1O,S). The central domain depleted for *CUC2* and *CUC3*  
191 expression expanded during later stages (P9-P10 in plants at >6LD), the expression of the two  
192 reporters concentrating into a necklace-shaped structure around the outgrowing  
193 meristematic dome (Fig. 1P,T).

194         In conclusion, CaAM formation is a rapid process leading to *de novo* establishment of  
195 a novel functional meristem, containing an organizing center and stem cell population. *CUC2*  
196 and *CUC3* expression is dynamic during CaAM formation shifting from an expression  
197 throughout the meristem to an expression restricted around the meristem.

198

199

200 Identification of putative regulators of *CUC* gene dynamic expression.

201 To identify possible transcriptional regulators of the dynamic expression of the *CUC2*  
202 and *CUC3* genes during AM formation, we performed an enhanced yeast one-hybrid screen  
203 using the *CUC2* and *CUC3* promoter regions as baits (Gaudinier et al., 2011). Thus, we  
204 identified SOD7/NGAL2 as a protein binding to the *CUC3* promoter. SOD7/NGAL2 is a member  
205 of the small family of NGATHA-like transcription factors (Romanel et al., 2009; Swaminathan  
206 et al., 2008). We did not detect any interaction with ABS2/NGAL1, while DPA4/NGAL3 was  
207 not present in the transcription factor collection we screened (See Supplementary Material).  
208 However, because the *NGAL* genes were shown to repress *CUC* genes during leaf and seedling  
209 development (Engelhorn et al., 2012; Shao et al., 2020), we next tested whether the *NGAL*  
210 genes could be involved in AM development.

211

212 The *SOD7/NGAL2* and *DPA4/NGAL3* genes are redundantly required for AM formation.

213 To determine if the *NGAL* genes had a role in AM development, we grew single and  
214 multiple *ngal* mutants for 5 weeks in LD conditions. Undeveloped or delayed CaAMs were  
215 frequently observed in the *dpa4-2 sod7-2* double mutant and *abs1 dpa4-2 sod7-2* triple  
216 mutant, compared to the CaAMs in WT and other single or double mutants (Fig. 2A-H). To  
217 quantify this phenotype more precisely, we performed a kinetics of CaAM development and  
218 calculated the time point after bolting at which half of the CaAMs were developed ( $t_{50}$ ). We  
219 observed a delay in the development of CaAMs for the double *dpa4-2 sod7-2* ( $t_{50} = 6.9$  days)  
220 and triple *abs1 dpa4-2 sod7-2* ( $t_{50} = 6.6$  days) mutants compared to the WT and the other  
221 mutants ( $t_{50} = 1.5$  days) (Fig. 2I, Fig. S2A). A delay in RoAM development was also observed  
222 for the *dpa4-2 sod7-2* and *abs1 dpa4-2 sod7-2* mutants (Fig. S2B-D). Finally, the double  
223 mutant *dpa4-3 sod7-2* with another *dpa4* mutant allele also showed a delayed CaAM

224 development (Fig. S2G,H). All together, these data show that the *NGAL* genes are redundantly  
225 required for CaAM and RoAM development and that *DPA4* and *SOD7* play a major role in this  
226 process, while *ABS2* has only a minor contribution.

227         Next, we traced back the origin of the delayed AM development by looking at early  
228 stages of CaAMs and RoAMs in the WT and the *dpa4-2 sod7-2* mutant. In the WT, all the  
229 CaAMs rapidly switched from the dome stage at 8LD, to the leaf primordium stage at 10LD  
230 and at the flower primodium stage at 12LD (Fig. 2J, top plot). In contrast, no meristem was  
231 visible in the majority of the *dpa4-2 sod7-2* cauline leaves at 8LD, while meristems at the  
232 dome stage were present only in about half of the axils at 10LD (Fig. 2J, middle plot). The  
233 apparition of leaf primordium and flower primodium was also delayed compared to the WT.  
234 In addition, confocal observations of *dpa4-2 sod7-2* meristems at the dome stage, showed  
235 that their shape was often abnormal, with a perturbed cellular organization as the L1 layer  
236 showed anticlinal divisions, and divisions in any orientation were observed in the underlying  
237 L2 layer (Fig. 2K). To quantify the morphodynamics of CaAMs, we measured their width and  
238 height and calculated meristem aspect ratio (height divided by width). Interestingly, we  
239 observed on small *dpa4-2 sod7-2* CaAMs (width < 90 $\mu$ m), a higher meristem on average and  
240 a more important variability of its shape, compared to WT (Fig. 2M). Larger meristems tended  
241 to regain a normal shape when their size increased. We noticed an asynchronous  
242 development of the CaAM in *dpa4-2 sod7-2*, in contrast to what was observed in the WT, the  
243 size of the meristem was not correlated with the time spent by the plant under LD (Fig. 2N).  
244 Nevertheless, both mutant and wild-type meristems switched from the dome to the leaf  
245 primordium stage at a similar size. (Fig. 2O). RoAMs showed a delay of initiation between  
246 wild-type and *dpa4-2 sod7-2* but no modification of growth dynamics as in CaAMs (Fig. S2E,F).  
247 In conclusion, in the *dpa4-2 sod7-2* double mutant CaAM formation is delayed, asynchronous,

248 and associated with an abnormal cellular organisation and shape at the dome stage that  
249 reverts to a normal structure at the stage when leaf primordia are initiated.

250

251 The *SOD7/NGAL2* and *DPA4/NGAL3* genes are required for proper *CUC2* and *CUC3*  
252 expression in CaAMs.

253 Because the *NGAL* genes are known negative regulators of the *CUC* gene expression  
254 (Engelhorn et al., 2012; Shao et al., 2020), we analysed *CUC2* and *CUC3* expression during  
255 CaAM development in *dpa4-2 sod7-2* and WT. Quantitative RT-qPCR showed that *CUC2* and  
256 *CUC3* mRNAs levels are increased in developing axillary branches (Fig. S3H-I). To follow *CUC2*  
257 and *CUC3* expression during early stages of CaAMs, we introduced the pCUC2:erRFP and  
258 pCUC3:erCFP transcriptional reporters into the *dpa4-2 sod7-2* double mutant. In the WT  
259 dome stage, pCUC2:erRFP and pCUC3:erCFP reporter expressions were excluded from the  
260 meristem and were localized to its base (Fig. 3A,B). In contrast, strong and uniform expression  
261 of the reporters was observed in *dpa4-2 sod7-2* domes (Fig. 3C,D). At the leaf primordium  
262 stage, pCUC2:erRFP and pCUC3:erCFP reporters were expressed at the boundary domain of  
263 the developing leaf primordia in the WT (Fig. 3E,F). A similar expression pattern was observed  
264 in the *dpa4-2 sod7-2* mutant, with sometimes weak ectopic expression in the meristem (Fig.  
265 3G,H). Whole mount *in situ* hybridization confirmed a similar localization of *CUC2* and *CUC3*  
266 mRNA in the organ primordia boundary domain of both wild type and mutant meristems at  
267 the “leaf primordium” stage (Fig. 3M-R). *CUC3* mRNA was distributed throughout the  
268 meristem at the *dpa4-2 sod7-2* dome stage, in agreement with the expression pattern of the  
269 pCUC3:erCFP reporter (Fig. 3L). *CUC2* mRNA was observed in the rib zone of *dpa4-2 sod7-2*  
270 dome stage meristem (Fig. 3K), contrasting with the larger expression of the pCUC2:erRFP

271 reporter (Fig. 3C). Such a reduction of the pattern of *CUC2* mRNA may be due to the post  
272 transcriptional regulation of *CUC2* by miR164 (Nikovics et al., 2006; Peaucelle et al., 2007;  
273 Sieber et al., 2007). The hypothesis that indeed miR164 may negatively regulated *CUC2* during  
274 AM development is supported by the observation that the delay in CaAM development in the  
275 *dpa4-2 sod7-2* ( $t_{50} = 5.74$  days) mutant is enhanced by the inactivation of *MIR164A* ( $t_{50} = 6.77$   
276 days for *dpa4-2 sod7-2 mir164a-4*), one of the 3 *MIR164* genes (Nikovics et al., 2006)(Fig. S3A-  
277 E). Moreover combining *dpa4-2 sod7-2* with the miRNA resistant version of *CUC2*, *CUC2g-m4*  
278 (Nikovics et al., 2006) lead to an even stronger phenotype than *dpa4-2 sod7-2 mir164a-4* with  
279 no development of CaAM (Fig. S3F-G). Together, these data show that *DPA4* and *SOD7* repress  
280 *CUC2* and *CUC3* expression from the developing AM at the dome stage.

281

282 *CUC2* and *CUC3* are required for the delayed CaAM development in the *dpa4-2 sod7-*  
283 *2* double mutant

284 Because ectopic expression of *CUC2* and *CUC3* coincides with the developmental  
285 defects of the *dpa4-2 sod7-2* CaAMs, we next genetically tested the requirement of the *CUC*  
286 genes to delay CaAM development in *dpa4-2 sod7-2* (Fig. 4). Introducing the *cuc2-1* ( $t_{50} = 1.54$   
287 days) or *cuc3-105* null allele ( $t_{50} = 1.52$  days) into *dpa4-2 sod7-2* restored growth of the CaAMs  
288 (Fig. 4A-J, L, N). The *cuc2-3* weak allele ( $t_{50} = 1.79$  days) also led to a restoration of CaAM  
289 development, though to a slightly lower level than the *cuc2-1* null allele (Fig. 4M). In contrast,  
290 introducing the *cuc1-13* null allele ( $t_{50} = 5.57$  days) had no effect on CaAM development (Fig.  
291 4G,K). Observation of early stages of CaAM development showed that an active meristem  
292 with a proper cellular organization is more rapidly initiated in the *dpa4-2 sod7-2 cuc3-105*  
293 triple mutant compared to *dpa4-2 sod7-2* (Fig. 2J lower plot and Fig. 2K, L). Accelerated

294 meristem development has been reported in mutants affected in the strigolactone pathway  
295 or the growth repressor *BRC1* (Aguilar-Martínez et al., 2007; Booker et al., 2004; Stirnberg et  
296 al., 2002). However, introducing a mutant allele of *BRC1*, *MAX2* or *MAX3* into the *dpa4-2 sod7-*  
297 *2* led to no or weak restoration of CaAM growth (Fig. S4), suggesting that *DPA4* and *SOD7* do  
298 not control the strigolactone or *BRC1* pathway. Together, these observations suggest that  
299 ectopic expression of the *CUC2* and *CUC3* genes is responsible for defective CaAM  
300 organization and delayed activity in *dpa4-2 sod7-2*.

301

302 *DPA4* and *SOD7* are expressed in the boundary domain and transiently in the  
303 stemistem

304 To follow the expression of the *DPA4* and *SOD7* genes, we generated transcriptional  
305 reporters and combined them with the pCUC3:erCFP or pCUC2:erRFP reporters (Fig. 5 and  
306 Fig. S5). During early stages, pSOD7:GFP and pDPA4:GFP expression overlapped with  
307 pCUC3:erCFP and pCUC2:erRFP in an elongated domain between the meristem and the  
308 cauline leaf primordium (Fig. 5A,F,K,P). At the “eye” and “dome” stage, pSOD7:GFP and  
309 pDPA4:GFP were maintained in the central domain from which the meristem emerged, while  
310 pCUC3:erCFP or pCUC2:erRFP disappeared (Fig. 5B,G,L,Q). At these stages, pDPA4:GFP  
311 tended to show a higher expression on the SAM side. Fluorescence quantification along a  
312 radial axis from the SAM to the leaf primordium confirmed a stronger depletion of  
313 pCUC2:erRFP than pSOD7:GFP in the meristematic dome (Fig. 5C,E,H,J) while pDPA4:GFP  
314 showed a peak of expression in the boundary domains closer to the SAM, with a weaker  
315 expression in the emerging meristem and on the leaf primordium side (Fig. 5M,O,R,T). Later,  
316 pSOD7:GFP and pDPA4:GFP also became excluded from the meristem and limited to the

317 boundary domain where pCUC3:erCFP is expressed (Fig. 5D,I,N,S). A similar dynamic was  
318 observed when we compared pCUC2:erRFP with pDPA4:GFP or pCUC3:erRFP with pSOD7:GFP  
319 reporters (Fig. S5).

320

321 Disruption of putative NGAL binding sites in *CUC3* is sufficient to phenocopy the delay  
322 of *dpa4-2 sod7-2* secondary stem growth.

323 Next, we investigated the molecular interaction between NGAL proteins and the *CUC*  
324 genes. We and others have shown that DPA4 and SOD7 repress *CUC2* and *CUC3* expression  
325 and the ABS2/NGAL1 protein directly binds to the *CUC2* promoter (Engelhorn et al., 2012;  
326 Shao et al., 2020). It is also known that SOD7 binds to the promoter of the *KLUH* gene through  
327 a CACTTG motif (Zhang et al., 2015). RAV1, a transcription factor of the same family as  
328 DPA4/SOD7 recognizes a CACCTG motif (Yamasaki et al., 2004) and we found that SOD7 was  
329 able to bind *in vitro* to such a sequence present in the *CUC3* promoter (Fig. S6B). Altogether  
330 we identified 3 CACTTG and 3 CACCTG motives in the *CUC3* promoter and one CACCTG in the  
331 5' part of the *CUC3* CDS that could be putative DPA4/SOD7 binding sites (Fig. S6A). In order  
332 to test the role of these motifs in *CUC3* expression regulation, we generated a mutated  
333 version of *CUC3* with all 7 putative binding sites mutated (pCUC3-6m:CUC3-1m, the mutation  
334 in the CDS was silent). We introduced pCUC3-6m:CUC3-1m or a pCUC3:CUC3 control  
335 construct in the *cuc3-105* null mutant background. In contrast to what is observed under LD  
336 conditions (Fig. 4), *cuc3-105* plants shifted from SD to LD conditions showed a strong defect  
337 in CaAM initiation (63% CaAM not initiated at 32LD, Fig. 6A,B). This CaAM initiation defect  
338 was suppressed in pCUC3:CUC3 *cuc3-105* (4% CaAM not initiated) and pCUC3-6m:CUC3-1m  
339 *cuc3-105* lines (all CaAM initiated) (Fig 6D,E), suggesting that a functional CUC3 was produced

340 from both constructs. However while growth of the secondary stems was similar to the wild  
341 type in the complemented pCUC3:CUC3 *cuc3-105* lines, *cuc3-105* lines complemented with  
342 the mutated pCUC3-6m:CUC3-1m constructs showed a delayed development of secondary  
343 stems similar to *dpa4-2 sod7-2* (Fig. 6A-F). Furthermore, we observed a massive increase of  
344 *CUC3* transcript levels in pCUC3-6m:CUC3-m1 *cuc3-105* lines compared to WT, *cuc3-105* and  
345 the mutant complemented with pCUC3:CUC3 (Fig. 6G). Those results suggest the putative  
346 NGAL binding sites are required to repress *CUC3* expression and *CUC3* overexpression  
347 resulting from their mutation lead to a delay in CaAM growth, thus partially phenocopying  
348 the *dpa4-2 sod7-2* double mutant.

349         Because in *dpa4-2 sod7-2* we observed stronger *CUC3* expression than in WT, we next  
350 generated a pCUC3-6m reporter line to follow the pattern of the mutated promoter during  
351 CaAM development. The control reporter pCUC3:mCherry-N7 showed a clear depletion of the  
352 fluorescence in the initiating meristem at the eye and dome stages (Fig. 6H,I), as previously  
353 described with the pCUC3:erCFP reporter (Fig. 1). In contrast, the fluorescence of the pCUC3-  
354 m6:GFP-N7 reporter remained homogeneous and no clear depletion was observed at eye  
355 stage (Fig. 6J) while ectopic fluorescence remained in the developing meristem at the dome  
356 stage (Fig. 6K). Quantifications confirmed the diminution of the mean fluorescence intensity  
357 inside the dome of in the pCUC3:mCherry-N7 line whereas it remained high in the pCUC3-  
358 m6:GFP-N7 line (Fig. 6L-M). At the leaf primordium stage, both wild-type and mutated  
359 reporter constructs showed a similar expression in the boundary domain (Fig. S6D,E). This  
360 suggests that mutation of putative NGAL binding sites in pCUC3 delays its dynamic repression  
361 in the developing meristem. Remarkably, the pCUC3-m6:GFP-N7 reporter has the same  
362 dynamic as observed for *CUC3* transcript or pCUC3:erCFP reporter in *dpa4-2 sod7-2*. All these  
363 results suggest that disruption of putative NGAL binding sites on *CUC3* can induce ectopic



364 expression of *CUC3* in the center of the CaAM as observed in *dpa4-2 sod7-2*, which in turn  
365 delays secondary branch development.

366

367 Repression of the boundary identity is required for stem cell and stem cell niche  
368 establishment.

369 Because AM function is associated with *de novo* establishment of stem cells, we next  
370 investigated whether stem cell formation is perturbed in *dpa4-2 sod7-2* CaAMs. For this, we  
371 first followed the dynamics of a pCLV3:GUS reporter activation in CaAM (Fig. 7A-D). While at  
372 8LD, pCLV3:GUS was expressed in all the wild-type cauline leaf axils, none of the *dpa4-2 sod7-*  
373 *2* double mutant had a visible GUS staining, and at 12LD, only about half of the axils of the  
374 double mutant expressed the pCLV3:GUS reporter. The *dpa4-2 sod7-2 cuc3* triple mutant  
375 showed a faster pCLV3:GUS activation, confirming that CaAM formation was partly restored  
376 in this background compared to the *dpa4-2 sod7-2* double mutant (Fig. 7C,D). To further test  
377 whether the delayed pCLV3:GUS was due to the delayed outgrowth of the CaAMs in the  
378 double mutant, we compared *CLV3* expression by whole mount *in situ* hybridization in CaAMs  
379 of different genotypes at similar morphological stages (Fig. S7A-D). This showed that while at  
380 the dome stage most of the wild-type CaAMs expressed *CLV3*, only 23 % of the *dpa4-2 sod7-*  
381 *2* double mutant showed *CLV3* expression (n=17). *CLV3* was restored in all of the dome stage  
382 *dpa4-2 sod7-2 cuc3* CaAMs (n=10). This suggested that ectopic expression of *CUC3* in the  
383 *dpa4-2 sod7-2* meristem at the dome stage prevents activation of *CLV3*, and that boundary  
384 fate needs to be repressed to allow stem cell establishment. Interestingly, when *CLV3* was  
385 again observed at the dome stage CaAMs of *dpa4-2 sod7-2* and *dpa4-2 sod7-2 cuc3-105*, its  
386 expression pattern was sometimes abnormal as *CLV3* tended to be expressed in the centre of

387 the meristem as was observed during wild-type RoAM initiation (Fig. S7E,F, Fig. 1S).  
388 Respectively 78% and 70% of *dpa4-2 sod7-2* (n=14) and *dpa4-2 sod7-2 cuc3-105* (n=10)  
389 CaAMs showed such central ectopic expression of *CLV3*. This ectopic central expression of  
390 *CLV3* is likely to be a transition phase as it was mostly observed on small CaAM in *dpa4-2*  
391 *sod7-2* (width <90 $\mu$ m), while larger meristems showed a normal apical expression pattern  
392 (Fig. 7E). Interestingly, the ectopic expression of *CLV3* in *dpa4-2 sod7-2* can be correlated with  
393 the perturbed cellular organization observed at the dome stage in *dpa4-2 sod7-2* (Fig. 2).

394 Next, because *WUS* is expressed earlier and activates *CLV3*, we wanted to know if *WUS*  
395 expression was also delayed in *dpa4-2 sod7-2*. For this, we compared the dynamics of the  
396 pWUS:VENUS-NLS and pCUC3:erCFP reporters in wild-type and *dpa4-2 sod7-2* plants (Fig. 7G-  
397 P). In the wild-type background, at the eye-stage, we observed a few cells expressing  
398 pWUS:VENUS-NLS in the center of the developing CaAM where pCUC3:erCFP expression  
399 started to disappear (Fig. 7G,H). Later on during the dome stage, pWUS:VENUS-NLS  
400 expression pattern enlarged and was highest in the meristem part where pCUC3:erCFP  
401 expression was low (Fig. 7I,J). Interestingly, in the smallest *dpa4-2 sod7-2*, CaAM  
402 pWUS:VENUS-NLS was very strong in a few cells at the outer base of the meristem, forming a  
403 ring-shaped structure which was complementary to the pattern of pCUC3:erCFP inside the  
404 whole dome of the CaAM (Fig. 7K,L). Much weaker pWUS:VENUS-NLS expression was  
405 detected in a few cells within the meristem. Later on, pWUS:VENUS-NLS expression increased  
406 in the meristem of *dpa4-2 sod7-2* mutants (Fig. 7M,N). Lastly, during leaf primordium stage,  
407 a normal expression of pWUS:VENUS-NLS was observed in *dpa4-2 sod7-2* while pCUC3:erCFP  
408 expression returned to the boundary domains (Fig. 7O,P). Whole mount *in situ* hybridization  
409 confirmed ectopic *WUS* expression at the base of the *dpa4-2 sod7-2* meristems while the  
410 *dpa4-2 sod7-2 cuc3-105* triple mutant showed a wild-type *WUS* pattern (Fig. S7G-I).

411 Linking these *WUS* patterns with meristem size, confirmed that in the wild type, small  
412 meristem had an enlarged *WUS* expression while at later stages it became restricted to the  
413 centre of the meristem (Fig. 7F). In *dpa4-2 sod7-2* mutants, *WUS* switched from an initial  
414 expression in ring-shaped pattern around its base to an expression throughout the meristem  
415 before becoming restricted to a central normal domain (Fig. 7F). Those results suggested that  
416 ectopic expression of *CUC2/CUC3* prevents activation of *WUS* in the meristem.

417 Together, our results lead to a scenario where the *DPA4* and *SOD7* transcription factors are  
418 essential for a rapid repression of the *CUC2/CUC3* genes from the developing AM during the  
419 expansion phase in which the number of meristematic cells increases. If such a rapid  
420 repression does not occur, ectopic *CUC2/CUC3* expression would lead to defective meristem  
421 growth and organisation, and delayed activation of *WUS* in the meristem, which in turn would  
422 lead to a delayed activation of *CLV3* and hence to defective *de novo* stem cell niche  
423 establishment.

424

#### 425 *DPA4* and *SOD7* facilitate the establishment of the stem cells in the floral meristem

426 To test whether *DPA4* and *SOD7* had a general role in *de novo* stem cell formation we analysed  
427 stem cell establishment in newly formed floral meristems using the p*WUS*:VENUS-NLS and  
428 p*CLV3*:mCHERRY-NLS reporters. In agreement with previous reports (Mayer et al., 1998), in  
429 the wild type, p*WUS*:VENUS-NLS was expressed in a small proportion of the floral meristems  
430 at stage 1 and was expressed in all stage 2 flowers (Fig. 7S). Slightly less stage 1 and stage 2  
431 *dpa4-2 sod7-2* floral meristems expressed p*WUS*:VENUS-NLS, suggesting a small delay in *WUS*  
432 activation which was also observed when the meristems were staged according to their size  
433 (Fig. 7S). Interestingly, *CLV3* expression was more affected than *WUS*. Indeed, while 44% of

434 wild-type stage 2 floral meristems expressed pCLV3:mCHERRY-NLS, only 11% of the *dpa4-2*  
435 *sod7-2* expressed it (Fig 7Q,R,T). At stage 3, all wild-type meristems expressed the CLV3  
436 reporter while it was absent from 18% of the *dpa4-2 sod7-2* meristems (Fig. 7T). Accordingly,  
437 pCLV3:mCHERRY-NLS started to be expressed in *dpa4-2 sod7-2* floral meristems that were  
438 almost twice as big as the wild type (Fig. S8). Based on those results, we can conclude that  
439 *DPA4* and *SOD7* act together to facilitate *de novo* stem cell establishment in floral meristems.

440

## 441 **DISCUSSION**

442 Stem cells are important throughout the life of all living organisms and, in plants, new  
443 population of stem cells and their enclosing meristems have to be formed throughout their  
444 life to enable continuous growth and branching. Such meristems are formed in the axils of  
445 leaves from boundary domains that maintain meristematic features. Work in the recent years  
446 has shown that AM initiation requires the maintenance of a meristematic fate by a dense  
447 network of interacting transcription factors and hormones, in which the *CUC* boundary genes  
448 play a central role, and accordingly *cuc* mutants show strong defects in meristem initiation  
449 (Hibara et al., 2006; Keller et al., 2006; Müller et al., 2006; Raman et al., 2008; Tian et al.,  
450 2014). Here we show that the expression of the *CUC* genes has to be down-regulated for the  
451 initiating meristem to proceed to the establishment phase and become active. We show that  
452 the NGAL transcription factors DPA4 and SOD7 are required to effectively remove *CUC*  
453 expression from the initiating AM. *CUC* mis-expression in the developing AM leads to  
454 asynchronous and delayed meristem formation, associated with abnormal cellular  
455 organization. Notably, ectopic expression of these boundary cell fate genes prevents stem cell  
456 establishment that is required for meristem activity. Because we observed that delayed stem  
457 cell formation also occurs in floral meristems of the *dpa4-2 sod7-2* double mutant, our work  
458 reveals a conserved genetic circuit by which the NGAL transcription factors repress the *CUC*  
459 boundary genes to allow *de novo* stem cell establishment in newly formed meristems.

460

461 Arabidopsis can form AMs from both its rosette and cauline leaves and our work highlights  
462 differences previously unknown between the development of these two structures. First,  
463 while the formation of the RoAMs is a slow process extending over numerous plastochrons,  
464 the formation of the CaAM is much faster. For instance, *WUS* expression is initiated in P13 in

465 RoAMs (Wang et al., 2017) while we observed *WUS* expression as early as P7 in CaAMs. As a  
466 consequence, the balance between relative growth of the leaf and the associated AM is  
467 pushed towards the leaf in the rosette and towards the meristem in cauline leaves. Indeed,  
468 we observed within successive CaAMs a trend of the AM to develop even faster relative to  
469 the leaf primordium in the upper nodes before the reproductive stage. Interestingly, it has  
470 been suggested that in the case of the floral meristem (a modified AM), the growth of a cryptic  
471 bract (a modified leaf) is suppressed (Long and Barton, 2000; Ohno et al., 2004). Altogether,  
472 this suggests that bract suppression during flower development may not be such an abrupt  
473 event as previously thought but could be the culminating point of a progressive reduction of  
474 lateral organ growth relative to AM development as the plant further matures.

475 A second difference between RoAMs and CaAMs, is that CaAMs grow out directly after their  
476 initiation with no apparent phase of dormancy. As a consequence, mutations in genes  
477 inhibiting AM outgrowth such *BRC1* or those of the strigolactone pathway like *MAX2/3*  
478 (Aguilar-Martínez et al., 2007; Booker et al., 2004; Stirnberg et al., 2002) do not further  
479 increase CaAM branching. Our genetic analysis indicate that the slow outgrowth of the *dpa4-*  
480 *2 sod7-2* CaAMs can be slightly sped-up by mutations in the strigolactone pathway  
481 components or *brc1*, suggesting that these pathways may still be active in CaAMs. However,  
482 the level of phenotypic restoration observed in these mutants is much lower than the one  
483 observed with the *cuc* mutations, suggesting that these pathways are not the ones primarily  
484 affected in the *dpa4-2 sod7-2* mutants.

485 A third difference between CaAMs and RoAMs can be seen in the dynamics of gene activation  
486 leading to stem cell establishment. While in both organs, *WUS* is activated before *CLV3*, in  
487 CaAM, the *WUS* domain shifts from an apical to a central position while in RoAM, *WUS* is  
488 already expressed in the central domain. In turn, *CLV3* is properly positioned in apical position

489 from the beginning in CaAM, while in RoAM it moves from a central to an apical position. (Xin  
490 et al., 2017). Further characterizing in CaAM cytokinin signaling or HAM gene spatial patterns,  
491 that have been shown to contribute to stem cell establishment in RoAMs, will be necessary  
492 to understand these differences (Han et al., 2020a, 2020b; Wang et al., 2017; Zhou et al.,  
493 2018).

494

495 Our data show that while *CUC* genes are required for AM formation (Hibara et al., 2006;  
496 Raman et al., 2008), likely by preventing cell differentiation and maintaining cells in a  
497 meristematic fate, their expression has to be negatively regulated to allow proper meristem  
498 establishment. Their prolonged, ectopic expression in the meristem is associated with  
499 asynchronous growth, abnormal cellular and meristem organization and delayed organ  
500 initiation. These defects can be traced back to some roles of the *CUC* genes as these genes  
501 have been shown to affect cell proliferation and cell expansion (Kierzkowski et al., 2019; Larue  
502 et al., 2009; Peaucelle et al., 2007; Serra and Perrot-Rechenmann, 2020; Sieber et al., 2007)  
503 as well as auxin transport and signaling (Bilsborough et al., 2011; Heisler et al., 2005;  
504 Maugarny-Calès et al., 2019). However, following an initial phase during which *dpa4-2 sod7-*  
505 *2* meristems are misshapen, they recover, restraining *CUC2* and *CUC3* to the boundary.  
506 Because this transition is accelerated in a *cuc3* mutant background, it suggests that ectopic  
507 *CUC* activity may be limiting for this. Such a reversion to a recovering meristem could be  
508 controlled by genetic factors. For instance, *ABS2*, the third *NGAL* gene, may contribute to  
509 exclude *CUC* expression from the meristem. However, because no major differences were  
510 observed between AM phenotype in *dpa4-2 sod7-2* double and *dpa4-2 sod7-2 abs1* triple  
511 mutant, this suggests *ABS2* role may be limited. Alternatively, miR164, which is a well-known  
512 repressor of *CUC2* expression that acts independently of *NGAL* genes (Engelhorn et al., 2012)

513 may also be involved. Our genetic analysis with mutations modifying miR164 activity supports  
514 such a role.

515 An alternative hypothesis also emerges from the comparison with the patterning of the leaf  
516 margin that leads to teeth formation. In the case of the leaf margin, a pattern with  
517 discontinuous *CUC* expression stripes forms as an emergent property of interconnected  
518 feedback loops between *CUC* activity and auxin transport and signalling (Bilsborough et al.,  
519 2011). In addition to the dynamics of these feedback loops, growth is essential for this  
520 patterning process as it generates a cellular template large enough for the feedback loops to  
521 be deployed. In such a view, *CUC* expression patterns would be able to reorganize once the  
522 slowly growing meristems of the *dpa4 sod7* mutants would reach a critical size threshold.  
523 Testing such an hypothesis would require further investigations of the interconnections  
524 between AM growth and gene expression dynamics for instance through combined modelling  
525 and experimental perturbation of growth.

526

527 The final step in meristem formation is the *de novo* establishment of an active stem cell niche.  
528 This is essential for the indeterminate fate of AM but is also required for proper floral  
529 morphogenesis as a reduction of the inner organs is observed in *wus* flowers in which the  
530 stem cell niche is not properly specified (Laux et al., 1996). In both axillary and floral  
531 meristems, *WUS* activation precedes the expression of the stem cell marker *CLV3*. Here, we  
532 show that in the wild-type initiating CaAM, *WUS* expression is rapidly induced in a few cells  
533 that are depleted for *CUC3* expression. Later, the *WUS* domain progressively enlarges,  
534 occupying most of the developing meristem that is complementary to the *CUC3*-expressing  
535 cells. In *dpa4-2 sod7-2*, *CUC2* and *CUC3* mis-expression during the dome stage profoundly  
536 modifies *WUS* expression patterns, which becomes mostly restricted to a ring-shaped



537 structure at the base of the meristem and excluded from the meristem itself. Therefore, as in  
538 the wild type, the expression patterns of the *CUC* genes and *WUS* are essentially mutually  
539 exclusive in *dpa4 sod7* double mutant. This observation suggests a scenario in which *CUC3*  
540 represses *WUS* expression although alternative scenarios are possible. For instance, it has  
541 been suggested that geometrical changes of an emerging meristem may be sufficient for the  
542 activation of new *WUS* and *CLV3* domains (Gruel et al., 2016). In such a view, defects in *WUS*  
543 and *CLV3* activation in the double *dpa4-2 sod7-2* mutant could be a consequence of abnormal  
544 meristem growth or shape.

545 While AM are initiated from a group of cells expressing the *CUC2* and *CUC3* organ boundary  
546 genes, these boundary domains are located on one side of the initiating floral meristem  
547 (Heisler et al., 2005). Indeed, in floral meristems, *CUC* genes are expressed at stage 1 forming  
548 the boundary between the floral primordia and the SAM until their expression disappears at  
549 stage 4 (Hibara et al., 2006). Despite these differences in the origin of the meristem relative  
550 to the boundary domain, *dpa4 sod7* mutants show a delayed stem cell specification in both  
551 AM and floral meristems, suggesting that the *NGAL/CUC* regulatory module similarly controls  
552 *de novo* stem cell formation in all aerial post-embryonically formed meristems.

553

554

## 555 MATERIALS & METHODS

556

### 557 Plant material and growth conditions

558 All genotypes are in the Columbia-0 (WT) ecotype. *The cuc2-1* mutant was isolated from  
559 Landsberg *erecta* ecotype but was backcrossed 5 times in Col-0 (Hasson et al., 2011). The  
560 mutant allele, *dpa4-2* (Engelhorn et al., 2012), *sod7-2* and *dpa4-3* (Zhang et al., 2015), *abs1*  
561 (Shao et al., 2012), *cuc1-13*, *cuc2-3*, *cuc3-105* (Hibara et al., 2006), *brc1-2* (Aguilar-Martínez  
562 et al., 2007), *max2-1* (Stirnberg et al., 2007) and *max3-11* (Booker et al., 2004) were previously  
563 described, as well as the pCUC3:erCFP (Gonçalves et al., 2015), pCUC2:erRFP (Gonçalves et  
564 al., 2017), CUC2g-m4 (Nikovics et al., 2006), pCLV3:GUS (Brand et al., 2002) and  
565 pCLV3::mCHERRY-NLS/pWUS::3X VENUS-NLS (Pfeiffer et al., 2016).

566 Seeds were soaked in water at 4°C for 48 hours prior to sowing. Plants were grown in soil  
567 either in long-day (LD) conditions [2 h dawn (19°C, 65% hygrometry, 80 μmol.m<sup>-2</sup>.s<sup>-1</sup> light),  
568 12h day (21°C, 65% hygrometry, 120 μmol.m<sup>-2</sup>.s<sup>-1</sup> light), 2h dusk (20°C, 65% hygrometry, 80  
569 μmol.m<sup>-2</sup>.s<sup>-1</sup> light), 16 h dark (18°C, 65% hygrometry, no light)] or in short-day (SD) conditions  
570 [1 h dawn (19°C, 65% hygrometry, 80 μmol.m<sup>-2</sup>.s<sup>-1</sup> light), 6 h day (21°C, 65% hygrometry, 120  
571 μmol.m<sup>-2</sup>.s<sup>-1</sup> light), 1 h dusk (20°C, 65% hygrometry, 80 μmol.m<sup>-2</sup>.s<sup>-1</sup> light), 16 h dark (18°C,  
572 65% hygrometry, no light)] and then shifted to LD. Seedlings from Fig. 7G were grown in vitro  
573 on Arabidopsis medium Duchefa in long day conditions [16h light / 8h dark at 21°C].

574

### 575 Enhanced Yeast One-Hybrid Analysis

576 CUC2 and CUC3 promoters were amplified by PCR using promCUC2 Fwd and promCUC2 Rv  
577 (3.7 kb) and prCuc3 – Fw and prCuc3 – R (4.3 kb) (see Primers in Supplemental Table 1). They  
578 were recombined with the 5'TOPO plasmid and then into pMW2 and pMW3 for HIS3 and

579 LACZ reporter selection, respectively. Bait constructs were transformed into yeast as  
580 described in Gaudinier et al. (2011) and selected for on -His and -Ura dropout media and for  
581 minimal auto-activation in the reporter assays. The prey transcription factor collection used  
582 is described in Gaudinier et al. (2011) and Truskina et al. (2021) (see full list in Supplemental  
583 Table 2). Bait and prey transcription factors were introduced into a diploid yeast colony using  
584 the mating method as described in Gaudinier et al. (2011). The interaction between SOD7 and  
585 pCUC3 led to LACZ reporter activation but no HIS3 activation.

586

### 587 **Generation of transgenic plants**

588 2.8 kb promoter of *DPA4* was amplified with Pdpa4-2FW and Pdpa4-2RV (Supplemental Table  
589 1) and inserted in front of a GFP in the pMDC107 to generate pDPA4:GFP. 2.1 kb promoter of  
590 *SOD7* (Zhang et al., 2015) was amplified with SOD7Profwattb1 and SOD7Prorvattb2 primers  
591 and inserted in front of a GFP in the pMDC107 to generate pSOD7:GFP. The promoters of  
592 *DPA4* and *SOD7* were cloned using a Gateway strategy.

593 All the parts used by a Goldenbraid 2.0 strategy (Sarrion-Perdigones et al., 2013) are listed in  
594 Supplemental Table 3. 4.3 kb promoter of *CUC3* was amplified and domesticated with  
595 GB\_S1pCUC3S2\_F and GB\_S1pCUC3S2\_R and inserted in the pUPD2. 3 patches of *CUC3*  
596 coding sequence of respectively 175bp, 644bp and 273bp were amplified with CUC3\_S2F and  
597 CUC3\_dom1R for patch1, CUC3\_dom1F and CUC3\_dom2R for patch2 and CUC3\_dom2F and  
598 CUC3\_S7R for patch3, combined to obtain a 1kb fragment and then inserted in the pUPD2. To  
599 generate *CUC3-1m*, we used *CUC3* pUPD2 as a matrix and amplified with CUC3\_S2F and  
600 CUC3\_CDS\_PF3\_r a first patch and with CUC3\_CDS\_PF3\_f and CUC3\_S7R a second patch to  
601 generate a silent mutation into the *NGAL* binding site mutation BS3 (Fig. S7A). A 3.7 kb  
602 fragment of *CUC3* promoter with the six binding sites mutated (pCUC3-6m) (Fig. S7A) was

603 synthesized by Genewiz (<https://www.genewiz.com/>) in a pUC-GW-Kan vector. Then the 3,7  
604 kb pCUC3-6m fragment was excised from pUC-GW-Kan with Nsil-PstI enzymes and inserted  
605 into the pCUC3 pUPD2 vector also digested Nsil-PstI enzymes to generate a pCUC3-6m  
606 pUPD2.

607 To form the transcriptional unit (T.U), the different parts into the pUPD2 vectors were  
608 inserted in an pDGB3\_α1 binary vector. The different T.U in pDGB3\_α1 were combined  
609 either with pnos:hygro:tnos pDGB3\_α2 or with pCMV:DSRed:tnos pDGB3\_α2 into an  
610 pDGB3\_Ω1 binary vector.

611 The resulting constructs (pMDC107 or pDGB3\_Ω1) were sequence-verified and transferred  
612 into *Agrobacterium tumefaciens* strain GV3101. Plants were transformed by floral dipping.  
613 Primary transformants were selected *in vitro* for their resistance to hygromycin (pMDC107,  
614 pDGB3\_Ω1) or selected with the red selection marker (pDGB3\_Ω1). Several primary  
615 transformants were analysed for their phenotype and for each construction at least two  
616 independent lines were selected based on resistance segregation.

617

#### 618 **RNA whole mount *in situ* hybridization**

619 RNA *in situ* hybridization was completed as described in Chelysheva et al., (in preparation).  
620 Primers used to amplified the probes are indicated in Supplemental Table 1. *In situ* signal was  
621 revealed using the Vector® Blue Substrate Kit, Alkaline Phosphatase (Vector Laboratories) and  
622 imaged by confocal microscopy (see Supplemental Table 4)

623

#### 624 **CaAM preparation for confocal imaging**

625 Plants were grown for 4 weeks in SD and shifted to LD. All observations were done in CaAM  
626 between 5 and 16 days after shifting in LD. All the observations were on fresh samples except

627 for Fig. 1A-D, 2K,L where samples were fixed on 4% paraformaldehyde under vacuum for 1h  
628 and clearing in Clearsee (xylitol 10%, urea 25%, deoxycholate15%) (Kurihara et al., 2015) and  
629 Calcofluor (0.1%) for at least 2 weeks. Hand dissected meristems were mounted between  
630 slide and coverslip with Tris HCl 10mM pH = 8,5, Triton 0,01%.

631

### 632 **Confocal imaging**

633 Confocal imaging was performed on a Leica SP5 inverted microscope (Leica Microsystems,  
634 Wetzlar, Germany). Lenses are Leica 40x HCX PL APO CS. Acquisition parameters are  
635 presented in Supplemental Table 4. Imaging was done from above for apices until 10-12 LD  
636 while older apices had to be imaged from the side. Figures were made using ImageJ and  
637 FigureJ (Mutterer and Zinck, 2013). All the confocal images are maximum projections.

638

### 639 **Signal normalisation and averaging.**

640 Fluorescence profiles were computed using Fiji, then spatially normalized and averaged based  
641 on the two major signal peaks. First, each peak localization was determined along each  
642 individual signal profile. For this, the profile was split into two, on either side of the profile  
643 median position. Each of the two peaks was localized as the position of the maximal signal  
644 value on the corresponding side. To register several profiles, resulting peaks were put in  
645 correspondence using linear scaling and translation of the profile axis. In the resulting referent  
646 axis, the distance between the two peaks can either be arbitrary chosen, e.g., by specifying  
647 that the two normalized peaks are separated one from each other by a distance of 1 unit, or  
648 automatically from input data, e.g., by using the average distance between peaks computed  
649 from the data. After individual data normalization, profiles were averaged to yield the mean

650 signal intensity profile. A script was developed in R for this and used to generate Fig. 5E,JO,T  
651 and Fig. 6 L,M

652

### 653 **Scanning electron microscopy**

654 Freshly sampled tissues were cooled to -33C° by a peltier cooling stage (Deben) and observed  
655 with a Hirox SH-1500 benchtop scanning electron microscope.

656

### 657 **RNA extraction and RT-qPCR expression analysis**

658 Total RNA were isolated using RNAeasy Plant Mini Kit (Qiagen) following manufacturer's  
659 instructions for plant tissue including DNase treatment. Reverse transcription was performed  
660 using RevertAid H Minus M-MuLV Reverse transcriptase (Fermentas) followed by a RNase H  
661 treatment for 20 min at 37°C to eliminate DNA-RNA duplexes. Real time PCR analysis was  
662 performed on a Bio-Rad CFX connect machine using the SsoAdvance Universal SYBR Green  
663 Supermix following manufacturer's instruction. PCR conditions are as follows: Conditions:  
664 95°C 3min; (95°C 10s; 63°C 10s; 72°C 10s) x45 cycles. Primers used for real time PCR analysis  
665 are available in Supplemental Table 1. Expression data were normalized using the  $\Delta\Delta C_t$   
666 method (Livak and Schmittgen, 2001).

667

### 668 **GUS staining**

669 GUS staining was performed as described (Sessions et al., 1999) in the presence of 0.2 mM  
670 potassium ferricyanide and potassium ferrocyanure. The reaction was stopped with 95%  
671 ethanol, which was also used to remove the chlorophyll from the tissues.

672

### 673 **Phenotypic analysis**

674 A count of CaAM and RoAM development was carried out over a period of twenty days after  
675 bolting (determined when the primary stem > 1 mm) on plants grown 5 weeks on LD. CaAM  
676 and RoAM were counted every 2 days. A meristem is considered present when it begins to  
677 grow and be sufficiently visible to the naked eye (> 3mm). In addition, the final number of  
678 stem leaves and rosettes was also counted. We calculated the time point after bolting at  
679 which half of the CaAMs or RoAM were developed ( $t_{50}$ ) using a R script.

680 A count of the stages of development of CaAM was carried out over a period of twenty days  
681 after bolting (determined when the primary stem > 1 mm) on plants grown 4 weeks in SD and  
682 then shifted to LD. Observations were done on CaAM between 8 and 28 days after shifting in  
683 LD using a binocular microscope.

684

685

## 686 **ACKNOWLEDGMENT**

687 We thank P. Cubas, C. Rameau and the NASC for providing seeds. We thank N. Arnaud, N.  
688 Bouré, M. Azzopardi, L. Gissot for providing parts used in the Goldenbraid cloning steps. We  
689 thank members of the FTA team at IJPB for discussion and N Arnaud for comments on the  
690 manuscript. The IJPB benefits from the support of Saclay Plant Sciences-SPS (ANR-17-EUR-  
691 0007). This work has benefited from the support of IJPB's Plant Observatory technological  
692 platforms and financial support from the France Berkeley Fund.

693

## 694 **AUTHOR CONTRIBUTION**

695 AN, PL and AMC conceived the project and PL supervised the project. AN performed most of  
696 the experiments with the help of PL. AMC, AMB and MS performed the Y1H screen under the  
697 supervision of SB. AMC did the preliminary genetic analysis. BA contributed to the generation

698 of the double mutant and transgenic lines. LC conceived the whole mount *in situ* protocol and  
699 supervised AN for this. Yu.L performed the gel shift experiment under the supervision of YL.  
700 JB wrote the fluorescence average script. AN and PL wrote the paper with inputs of AMC.

701

702

### 703 REFERENCES

704 Aguilar-Martínez, J.A., Poza-Carrión, C., and Cubas, P. (2007). Arabidopsis Branched1 acts as  
705 an integrator of branching signals within axillary buds. *Plant Cell* 19, 458–472.

706 Aida, M., and Tasaka, M. (2006). Genetic control of shoot organ boundaries. *Curr Opin Plant*  
707 *Biol* 9, 72–77.

708 Aida, M., Ishida, T., Fukaki, H., Fujisawa, H., and Tasaka, M. (1997). Genes involved in organ  
709 separation in Arabidopsis: an analysis of the cup-shaped cotyledon mutant. *Plant Cell* 9, 841–  
710 857.

711 Baurle, I., and Laux, T. (2003). Apical meristems: the plant's fountain of youth. *Bioessays* 25,  
712 961–970.

713 Besnard, F., Refahi, Y., Morin, V., Marteaux, B., Brunoud, G., Chambrier, P., Rozier, F., Mirabet,  
714 V., Legrand, J., Lainé, S., et al. (2014). Cytokinin signalling inhibitory fields provide robustness  
715 to phyllotaxis. *Nature* 505, 417–421.

716 Bilsborough, G.D., Runions, A., Barkoulas, M., Jenkins, H.W., Hasson, A., Galinha, C., Laufs, P.,  
717 Hay, A., Prusinkiewicz, P., and Tsiantis, M. (2011). Model for the regulation of Arabidopsis  
718 thaliana leaf margin development. *Proc Natl Acad Sci U S A* 108, 3424–3429.

719 Birnbaum, K.D., and Alvarado, A.S. (2008). Slicing across Kingdoms: Regeneration in Plants  
720 and Animals. *Cell* 132, 697–710.

721 Booker, J., Auldridge, M., Wills, S., McCarty, D., Klee, H., and Leyser, O. (2004). MAX3/CCD7 Is



722 a Carotenoid Cleavage Dioxygenase Required for the Synthesis of a Novel Plant Signaling  
723 Molecule. *Curr. Biol.* *14*, 1232–1238.

724 Brand, U., Fletcher, J.C., Hobe, M., Meyerowitz, E.M., and Simon, R. (2000). Dependence of  
725 stem cell fate in Arabidopsis on a feedback loop regulated by CLV3 activity. *Science* (80- ).  
726 *289*, 617-9.

727 Brand, U., Grunewald, M., Hobe, M., and Simon, R. (2002). Regulation of CLV3 Expression by  
728 Two Homeobox Genes in Arabidopsis. *Plant Physiol* *129*, 565-75.

729 Burian, A., Barbier de Reuille, P., and Kuhlemeier, C. (2016). Patterns of Stem Cell Divisions  
730 Contribute to Plant Longevity. *Curr. Biol.* *26*, 1385–1394.

731 Caggiano, M.P., Yu, X., Bhatia, N., Larsson, A., Ram, H., Ohno, C.K., Sappl, P., Meyerowitz, E.M.,  
732 Jönsson, H., and Heisler, M.G. (2017). Cell type boundaries organize plant development. *Elife*  
733 *6*, 1–32.

734 Cao, X., and Jiao, Y. (2020). Control of cell fate during axillary meristem initiation. *Cell. Mol.*  
735 *Life Sci.* *77*, 2343–2354.

736 Cao, X., Wang, J., Xiong, Y., Yang, H., Yang, M., Ye, P., Bencivenga, S., Sablowski, R., and Jiao,  
737 Y. (2020). A Self-Activation Loop Maintains Meristematic Cell Fate for Branching. *Curr. Biol.*  
738 *30*, 1893-1904.e4.

739 Chickarmane, V.S., Gordon, S.P., Tarr, P.T., Heisler, M.G., and Meyerowitz, E.M. (2012).  
740 Cytokinin signaling as a positional cue for patterning the apical-basal axis of the growing  
741 Arabidopsis shoot meristem. *Proc Natl Acad Sci USA* *109*, 4002–4007.

742 Comazetto, S., Shen, B., and Morrison, S.J. (2021). Niches that regulate stem cells and  
743 hematopoiesis in adult bone marrow. *Dev. Cell* *56*, 1848–1860.

744 Daum, G., Medzihradzky, A., Suzaki, T., and Lohmann, J.U. (2014). A mechanistic framework  
745 for noncell autonomous stem cell induction in Arabidopsis. *Proc. Natl. Acad. Sci.* *111*, 14619–

746 14624.

747 Dinneny, J.R., and Benfey, P.N. (2008). Plant Stem Cell Niches: Standing the Test of Time. *Cell*  
748 *132*, 553–557.

749 Engelhorn, J., Reimer, J.J., Leuz, I., Göbel, U., Huettel, B., Farrona, S., and Turck, F. (2012).  
750 DEVELOPMENT-RELATED PcG TARGET IN THE APEX 4 controls leaf margin architecture in  
751 *Arabidopsis thaliana*. *Development* *139*, 2566–2575.

752 Fletcher, J.C., Brand, U., Running, M.P., Simon, R., and Meyerowitz, E.M. (1999). Signaling of  
753 cell fate decisions by CLAVATA3 in *Arabidopsis* shoot meristems. *Science* (80-. ). *283*, 1911–  
754 1914.

755 Gaudinier, A., Zhang, L., Reece-Hoyes, J.S., Taylor-Teeples, M., Pu, L., Liu, Z., Breton, G.,  
756 Pruneda-paz, J.L., Kim, D., Kay, S.A., et al. (2011). Enhanced Y1H assays for *Arabidopsis*. *Nat.*  
757 *Methods* *8*, 1053–1055.

758 Gonçalves, B., Hasson, A., Belcram, K., Cortizo, M., Morin, H., Nikovics, K., Vialette-Guiraud,  
759 A., Takeda, S., Aida, M., Laufs, P., et al. (2015). A conserved role for CUP-SHAPED COTYLEDON  
760 genes during ovule development. *Plant J.* *83*, 732–742.

761 Gonçalves, B., Maugarny-Calès, A., Adroher, B., Cortizo, M., Borrega, N., Blein, T., Hasson, A.,  
762 Gineau, E., Mouille, G., Laufs, P., et al. (2017). GDP-L-fucose is required for boundary  
763 definition in plants. *J. Exp. Bot.* *68*, 5801–5811.

764 Grbic, V., and Bleecker, A.B. (2000). Axillary meristem development in *Arabidopsis thaliana*.  
765 *Plant J* *21*, 215-23.

766 Greb, T., Clarenz, O., Schafer, E., Herrero, R., Schmitz, G., and Theres, K. (2003). Molecular  
767 analysis of the LATERAL SUPPRESSOR gene in *Arabidopsis*. *Genes Dev.* *17*, 1175–1187.

768 Gruel, J., Landrein, B., Tarr, P., Schuster, C., Refahi, Y., Sampathkumar, A., Hamant, O.,  
769 Meyerowitz, E.M., and Jönsson, H. (2016). An epidermis-driven mechanism positions and

770 scales stem cell niches in plants. *Sci. Adv.* *2*, 22–24.

771 Han, H., Yan, A., Li, L., Zhu, Y., Feng, B., Liu, X., and Zhou, Y. (2020a). A signal cascade originated  
772 from epidermis defines apical-basal patterning of Arabidopsis shoot apical meristems. *Nat.*  
773 *Commun.* *11*, 1–17.

774 Han, H., Geng, Y., Guo, L., Yan, A., Meyerowitz, E.M., Liu, X., and Zhou, Y. (2020b). The  
775 Overlapping and Distinct Roles of HAM Family Genes in Arabidopsis Shoot Meristems. *Front.*  
776 *Plant Sci.* *11*, 1–10.

777 Hasson, A., Plessis, A., Blein, T., Adroher, B., Grigg, S., Tsiantis, M., Boudaoud, A., Damerval,  
778 C., and Laufs, P. (2011). Evolution and Diverse Roles of the CUP-SHAPED COTYLEDON Genes  
779 in Arabidopsis Leaf Development. *Plant Cell* *23*, 54–68.

780 Heisler, M.G., Ohno, C., Das, P., Sieber, P., Reddy, G. V, Long, J.A., and Meyerowitz, E.M.  
781 (2005). Patterns of auxin transport and gene expression during primordium development  
782 revealed by live imaging of the Arabidopsis inflorescence meristem. *Curr Biol* *15*, 1899–1911.

783 Hempel, F.D., and Feldman, L.J. (1994). Bi-directional inflorescence development in  
784 Arabidopsis thaliana: Acropetal initiation of flowers and basipetal initiation of paraclades.  
785 *Planta* *192*, 276–286.

786 Hibara, K., Karim, M.R., Takada, S., Taoka, K., Furutani, M., Aida, M., and Tasaka, M. (2006).  
787 Arabidopsis CUP-SHAPED COTYLEDON3 regulates postembryonic shoot meristem and organ  
788 boundary formation. *Plant Cell* *18*, 2946–2957.

789 Janocha, D., and Lohmann, J.U. (2018). From signals to stem cells and back again. *Curr. Opin.*  
790 *Plant Biol.* *45*, 136–142.

791 Keller, T., Abbott, J., Moritz, T., and Doerner, P. (2006). Arabidopsis REGULATOR OF AXILLARY  
792 MERISTEMS1 controls a leaf axil stem cell niche and modulates vegetative development. *Plant*  
793 *Cell* *18*, 598–611.

794 Kierzkowski, D., Runions, A., Vuolo, F., Strauss, S., Lymbouridou, R., Routier-Kierzkowska, A.L.,  
795 Wilson-Sánchez, D., Jenke, H., Galinha, C., Mosca, G., et al. (2019). A Growth-Based  
796 Framework for Leaf Shape Development and Diversity. *Cell* *177*, 1405-1418.e17.

797 Kim, Y.S., Kim, S.G., Lee, M., Lee, I., Park, H.Y., Seo, P.J., Jung, J.H., Kwon, E.J., Suh, S.W., Paek,  
798 K.H., et al. (2008). HD-ZIP III activity is modulated by competitive inhibitors via a feedback  
799 loop in Arabidopsis shoot apical meristem development. *Plant Cell* *20*, 920–933.

800 Kurihara, D., Mizuta, Y., Sato, Y., and Higashiyama, T. (2015). ClearSee: A rapid optical clearing  
801 reagent for whole-plant fluorescence imaging. *Dev.* *142*, 4168–4179.

802 Laird, D.J., von Andrian, U.H., and Wagers, A.J. (2008). Stem Cell Trafficking in Tissue  
803 Development, Growth, and Disease. *Cell* *132*, 612–630.

804 Landrein, B., Formosa-Jordan, P., Malivert, A., Schuster, C., Melnyk, C.W., Yang, W., Turnbull,  
805 C., Meyerowitz, E.M., Locke, J.C.W., and Jönsson, H. (2018). Nitrate modulates stem cell  
806 dynamics in Arabidopsis shoot meristems through cytokinins. *Proc. Natl. Acad. Sci. U. S. A.*  
807 *115*, 1382–1387.

808 Larue, C.T., Wen, J., and Walker, J.C. (2009). A microRNA-transcription factor module  
809 regulates lateral organ size and patterning in Arabidopsis. *Plant J* *58*, 450–463.

810 Laux, T., Mayer, K.F., Berger, J., and Jurgens, G. (1996). The WUSCHEL gene is required for  
811 shoot and floral meristem integrity in Arabidopsis. *Development* *122*, 87–96.

812 Leibfried, A., To, J.P., Busch, W., Stehling, S., Kehle, A., Demar, M., Kieber, J.J., and Lohmann,  
813 J.U. (2005). WUSCHEL controls meristem function by direct regulation of cytokinin-inducible  
814 response regulators. *Nature* *438*, 1172–1175.

815 Lenhard, M., Bohnert, A., Jurgens, G., and Laux, T. (2001). Termination of stem cell  
816 maintenance in Arabidopsis floral meristems by interactions between WUSCHEL and  
817 AGAMOUS. *Cell* *105*, 805-14.

818 Liu, X., Kim, Y.J., Müller, R., Yumul, R.E., Liu, C., Pan, Y., Cao, X., Goodrich, J., and Chen, X.  
819 (2011). AGAMOUS terminates floral stem cell maintenance in Arabidopsis by directly  
820 repressing WUSCHEL through recruitment of Polycomb Group proteins. *Plant Cell* 23, 3654–  
821 3670.

822 Livak, K.J., and Schmittgen, T.D. (2001). Analysis of relative gene expression data using real-  
823 time quantitative PCR and. *Methods* 25, 402–408.

824 Long, J., and Barton, M.K. (2000). Initiation of axillary and floral meristems in Arabidopsis.  
825 *Dev. Biol.* 218, 341–353.

826 Long, J.A., Moan, E.I., Medford, J.I., and Barton, M.K. (1996). A member of the KNOTTED class  
827 of homeodomain proteins encoded by the STM gene of Arabidopsis. *Nature* 379, 66–69.

828 Ma, Y., Miotk, A., Šutiković, Z., Ermakova, O., Wenzl, C., Medzihradszky, A., Gaillochet, C.,  
829 Forner, J., Utan, G., Brackmann, K., et al. (2019). WUSCHEL acts as an auxin response rheostat  
830 to maintain apical stem cells in Arabidopsis. *Nat. Commun.* 10, 5093.

831 Maugarny-Calès, A., Cortizo, M., Adroher, B., Borrega, N., Gonçalves, B., Brunoud, G.,  
832 Vernoux, T., Arnaud, N., and Laufs, P. (2019). Dissecting the pathways coordinating patterning  
833 and growth by plant boundary domains. *PLoS Genet.* 15, 1–30.

834 Mayer, K.F., Schoof, H., Haecker, A., Lenhard, M., Jürgens, G., and Laux, T. (1998). Role of  
835 WUSCHEL in regulating stem cell fate in the Arabidopsis shoot meristem. *Cell* 95, 805–815.

836 Morrison, S.J., and Spradling, A.C. (2008). Stem Cells and Niches: Mechanisms That Promote  
837 Stem Cell Maintenance throughout Life. *Cell* 132, 598–611.

838 Müller, D., Schmitz, G., and Theres, K. (2006). Blind homologous R2R3 Myb genes control the  
839 pattern of lateral meristem initiation in Arabidopsis. *Plant Cell* 18, 586–597.

840 Müller, R., Bleckmann, A., and Simon, R. (2008). The receptor kinase CORYNE of Arabidopsis  
841 transmits the stem cell-limiting signal CLAVATA3 independently of CLAVATA1. *Plant Cell* 20,

842 934–946.

843 Mutterer, J., and Zinck, E. (2013). Quick-and-clean article figures with FigureJ. *J. Microsc.* *252*,

844 89–91.

845 Nikovics, K., Blein, T., Peaucelle, A., Ishida, T., Morin, H., Aida, M., and Laufs, P. (2006). The

846 balance between the MIR164A and CUC2 genes controls leaf margin serration in Arabidopsis.

847 *Plant Cell* *18*, 2929–2945.

848 Ohno, C.K., Reddy, G. V, Heisler, M.G., and Meyerowitz, E.M. (2004). The Arabidopsis JAGGED

849 gene encodes a zinc finger protein that promotes leaf tissue development. *Development* *131*,

850 1111–1122.

851 Pardal, R., and Heidstra, R. (2021). Root stem cell niche networks: It’s complexed! Insights

852 from Arabidopsis. *J. Exp. Bot.* *72*, 6727–6738.

853 Peaucelle, A., Morin, H., Traas, J., and Laufs, P. (2007). Plants expressing a miR164-resistant

854 CUC2 gene reveal the importance of post-meristematic maintenance of phyllotaxy in

855 Arabidopsis. *Development* *134*, 1045–1050.

856 Perales, M., Rodriguez, K., Snipes, S., Yadav, R.K., Diaz-Mendoza, M., and Reddy, G.V. (2016).

857 Threshold-dependent transcriptional discrimination underlies stem cell homeostasis. *Proc.*

858 *Natl. Acad. Sci.* *113*, E6298–E6306.

859 Pfeiffer, A., Janocha, D., Dong, Y., Medzihradzky, A., Schöne, S., Daum, G., Suzaki, T., Forner,

860 J., Langenecker, T., Rempel, E., et al. (2016). Integration of light and metabolic signals for stem

861 cell activation at the shoot apical meristem. *Elife* *5*, 1–21.

862 Raman, S., Greb, T., Peaucelle, A., Blein, T., Laufs, P., and Theres, K. (2008). Interplay of

863 miR164, CUP-SHAPED COTYLEDON genes and LATERAL SUPPRESSOR controls axillary

864 meristem formation in Arabidopsis thaliana. *Plant J* *55*, 65–76.

865 Reinhardt, D., Pesce, E.R., Stieger, P., Mandel, T., Baltensperger, K., Bennett, M., Traas, J.,

- 866 Friml, J., and Kuhlemeier, C. (2003). Regulation of phyllotaxis by polar auxin transport. *Nature*  
867 426, 255–260.
- 868 Romanel, E.A.C., Schrago, C.G., Counago, R.M., Russo, C.A.M., Alves-Ferreira, M., Couñago,  
869 R.M., Russo, C.A.M., and Alves-Ferreira, M. (2009). Evolution of the B3 DNA binding  
870 superfamily: New insights into REM family gene diversification. *PLoS One* 4, e5791.
- 871 Sarrion-Perdigones, A., Vazquez-Vilar, M., Palací, J., Castelijns, B., Forment, J., Ziarsolo, P.,  
872 Blanca, J., Granell, A., and Orzaez, D. (2013). Goldenbraid 2.0: A comprehensive DNA assembly  
873 framework for plant synthetic biology. *Plant Physiol.* 162, 1618–1631.
- 874 Schlegel, J., Denay, G., Wink, R., Pinto, K.G., Stahl, Y., Schmid, J., Blümke, P., and Simon, R.G.  
875 (2021). Control of Arabidopsis shoot stem cell homeostasis by two antagonistic CLE peptide  
876 signalling pathways. *Elife* 10, 1–30.
- 877 Schoof, H., Lenhard, M., Haecker, A., Mayer, K.F., Jurgens, G., and Laux, T. (2000). The stem  
878 cell population of Arabidopsis shoot meristems is maintained by a regulatory loop between  
879 the CLAVATA and WUSCHEL genes. *Cell* 100, 635–44.
- 880 Seeliger, I., Frerichs, A., Glowa, D., Velo, L., Comelli, P., Chandler, J.W., and Werr, W. (2016).  
881 The AP2-type transcription factors DORNROSCHE and DORNROSCHE-LIKE promote G1/S  
882 transition. *Mol. Genet. Genomics* 291, 1835–1849.
- 883 Serra, L., and Perrot-Rechenmann, C. (2020). Spatiotemporal control of cell growth by CUC3  
884 shapes leaf margins. *Dev.* 147.
- 885 Sessions, A., Weigel, D., and Yanofsky, M.F. (1999). The Arabidopsis thaliana MERISTEM LAYER  
886 1 promoter specifies epidermal expression in meristems and young primordia. *Plant J* 20,  
887 259–263.
- 888 Shang, E., Wang, X., Li, T., Guo, F., Ito, T., and Sun, B. (2021). Robust control of floral meristem  
889 determinacy by position-specific multifunctions of Knuckles. *Proc. Natl. Acad. Sci. U. S. A.* 118,

890 1–11.

891 Shao, J., Liu, X., Wang, R., Zhang, G., and Yu, F. (2012). The Over-Expression of an Arabidopsis  
892 B3 Transcription Factor, *ABS2/NGAL1*, Leads to the Loss of Flower Petals. *PLoS One* 7, e49861.

893 Shao, J., Meng, J., Wang, F., Shou, B., Chen, Y., Xue, H., Zhao, J., Qi, Y., An, L., Yu, F., et al.  
894 (2020). *NGATHA-LIKEs* Control leaf margin development by repressing *cup-shaped cotyledon2*  
895 *transcription1*. *Plant Physiol.* 184, 345–358.

896 Shi, B., Zhang, C., Tian, C., Wang, J., Wang, Q., Xu, T., Xu, Y., Ohno, C., Sablowski, R., Heisler,  
897 M.G., et al. (2016). Two-Step Regulation of a Meristematic Cell Population Acting in Shoot  
898 Branching in Arabidopsis. *PLoS Genet.* 12, 1–20.

899 Sieber, P., Wellmer, F., Gheyselinck, J., Riechmann, J.L., and Meyerowitz, E.M. (2007).  
900 Redundancy and specialization among plant microRNAs: role of the *MIR164* family in  
901 developmental robustness. *Development* 134, 1051–1060.

902 Sloan, J., Hakenjos, J.P., Gebert, M., Ermakova, O., Gumiero, A., Stier, G., Wild, K., Sinning, I.,  
903 and Lohmann, J.U. (2020). Structural basis for the complex DNA binding behavior of the plant  
904 stem cell regulator *WUSCHEL*. *Nat. Commun.* 11, 2223.

905 Stirnberg, P., van De Sande, K., and Leyser, H.M. (2002). *MAX1* and *MAX2* control shoot lateral  
906 branching in Arabidopsis. *Development* 129, 1131–41.

907 Stirnberg, P., Furner, I.J., and Ottoline Leyser, H.M. (2007). *MAX2* participates in an SCF  
908 complex which acts locally at the node to suppress shoot branching. *Plant J.* 50, 80–94.

909 Sun, B., Looi, L.-S., Guo, S., He, Z., Gan, E.-S., Huang, J., Xu, Y., Wee, W.-Y., and Ito, T. (2014).  
910 Timing mechanism dependent on cell division is invoked by Polycomb eviction in plant stem  
911 cells. *Science* 343, 1248559.

912 Swaminathan, K., Peterson, K., and Jack, T. (2008). The plant B3 superfamily. *Trends Plant Sci.*  
913 13, 647–655.



914 Tian, C., Zhang, X., He, J., Yu, H., Wang, Y., Shi, B., Han, Y., Wang, G., Feng, X., Zhang, C., et al.  
915 (2014). An organ boundary-enriched gene regulatory network uncovers regulatory  
916 hierarchies underlying axillary meristem initiation. *Mol. Syst. Biol.* *10*, 755–755.

917 Truskina, J., Han, J., Chrysanthou, E., Galvan-Ampudia, C.S., Lainé, S., Brunoud, G., Macé, J.,  
918 Bellows, S., Legrand, J., Bågman, A.M., et al. (2021). A network of transcriptional repressors  
919 modulates auxin responses. *Nature* *589*, 116–119.

920 Wang, Y., and Jiao, Y. (2018). Axillary meristem initiation — a way to branch out. *Curr. Opin.*  
921 *Plant Biol.* *41*, 61–66.

922 Wang, J., Tian, C., Zhang, C., Shi, B., Cao, X., Zhang, T.Q., Zhao, Z., Wang, J.W., and Jiao, Y.  
923 (2017). Cytokinin signaling activates WUSCHEL expression during axillary meristem initiation.  
924 *Plant Cell* *29*, 1373–1387.

925 Wang, Q., Kohlen, W., Rossmann, S., Vernoux, T., and Theres, K. (2014a). Auxin depletion from  
926 the leaf axil conditions competence for axillary meristem formation in *Arabidopsis* and  
927 tomato. *Plant Cell* *26*, 2068–2079.

928 Wang, Q., Hasson, A., Rossmann, S., and Theres, K. (2016). Divide et impera: Boundaries shape  
929 the plant body and initiate new meristems. *New Phytol.* *209*, 485–498.

930 Wang, Y., Wang, J., Shi, B., Yu, T., Qi, J., Meyerowitz, E.M., and Jiao, Y. (2014b). The stem cell  
931 niche in leaf axils is established by auxin and cytokinin in *Arabidopsis*. *Plant Cell* *26*, 2055–  
932 2067.

933 Xie, T., and Spradling, A.C. (2000). A niche maintaining germ line stem cells in the *Drosophila*  
934 ovary. *Science* (80-. ). *290*, 328–330.

935 Xin, W., Wang, Z., Liang, Y., Wang, Y., and Hu, Y. (2017). Dynamic expression reveals a two-  
936 step patterning of WUS and CLV3 during axillary shoot meristem formation in *Arabidopsis*. *J.*  
937 *Plant Physiol.* *214*, 1–6.

- 938 Yadav, R.K., Perales, M., Gruel, J., Girke, T., Jonsson, H., and Reddy, G. V (2011). WUSCHEL  
939 protein movement mediates stem cell homeostasis in the Arabidopsis shoot apex. *Genes Dev.*  
940 *25*, 2025–2030.
- 941 Yamasaki, K., Kigawa, T., Inoue, M., Tateno, M., Yamasaki, T., Yabuki, T., Aoki, M., Seki, E.,  
942 Matsuda, T., Tomo, Y., et al. (2004). Solution structure of the B3 DNA binding domain of the  
943 Arabidopsis cold-responsive transcription factor RAV1. *Plant Cell* *16*, 3448–3459.
- 944 Yang, F., Wang, Q., Schmitz, G., Müller, D., and Theres, K. (2012). The bHLH protein ROX acts  
945 in concert with RAX1 and LAS to modulate axillary meristem formation in Arabidopsis. *Plant*  
946 *J.* *71*, 61–70.
- 947 Yoshida, S., Mandel, T., and Kuhlemeier, C. (2011). Stem cell activation by light guides plant  
948 organogenesis. *Genes Dev.* *25*, 1439–1450.
- 949 Žádníková, P., Simon, R., and Petra, Z. (2014). How boundaries control plant development.  
950 *Curr. Opin. Plant Biol.* *17*, 116–125.
- 951 Zhang, C., Wang, J., Wenkel, S., Chandler, J.W., Werr, W., and Jiao, Y. (2018). Spatiotemporal  
952 control of axillary meristem formation by interacting transcriptional regulators. *Development*  
953 *145*, 1–10.
- 954 Zhang, Y., Du, L., Xu, R., Cui, R., Hao, J., Sun, C., and Li, Y. (2015). Transcription Factors SOD7 /  
955 NGAL2 and DPA4 / NGAL3 Act Redundantly to Regulate Seed Size by Directly Repressing KLU  
956 Expression in Arabidopsis thaliana. *Plant Cell* *1*, 1–13.
- 957 Zhou, Y., Liu, X., Engstrom, E.M., Nimchuk, Z.L., Pruneda-Paz, J.L., Tarr, P.T., Yan, A., Kay, S.A.,  
958 and Meyerowitz, E.M. (2015). Control of plant stem cell function by conserved interacting  
959 transcriptional regulators. *Nature* *517*, 377–380.
- 960 Zhou, Y., Yan, A., Han, H., Li, T., Geng, Y., Liu, X., and Meyerowitz, E.M. (2018). Hairy meristem  
961 with wuschel confines clavata3 expression to the outer apical meristem layers. *Science* (80-

962 ). 361, 502–506.

963

964

965

966 **LEGENDS TO THE FIGURES**

967

968 **Figure 1. Rapid morphological changes and dynamic gene expression accompany CaAM**  
969 **formation.**

970 (A-D) Optical sections of calcofluor-stained axillary regions of wild-type following SD to LD  
971 transition. (A-B) Main panel: transverse optical section (with respect to the main stem axis),  
972 lower panel: reconstructed optical tangential section, right panel: reconstructed optical radial  
973 sections. Yellow lines mark the position of the tangential and radial sections. (C-D) Optical  
974 tangential sections.

975 The number of days in LD condition is indicated.

976 (E-L) Maximum projections of transverse (E,G,I,K) and tangential (F,H,J,L) optical sections of a  
977 pWUS:VENUS-NLS (E-H) and pCLV3:mCHERRY-NLS (I-L) reporter line during CaAM formation.  
978 (F,J,H and L) are a merge between reporter fluorescence and transmitted light. The number  
979 of days in LD condition is indicated.

980 (M-T) Maximum projections of transverse optical sections of a pCUC2:erRFP (M-P) and  
981 pCUC3:erCFP (Q-T) reporter line during CaAM formation. Positions are numbered according  
982 to the rank of the primordium. Primordium number is indicated.

983 Scale bars = 50µm; sam: shoot apical meristem; clp: cauline leaf primordium; \*: AM; lp: leaf  
984 primordium formed by the AM, fp: flower primordium formed by the AM. The dotted line  
985 corresponds to the outline of the cauline leaf primordium.

986

987 **Figure 2. *DPA4* and *SOD7* are required for rapid development of cauline AMs.**

988 (A–H) Inflorescence of WT, simple, double and triple *ngal* mutants. Plants were grown for 5  
989 weeks in long-day conditions. White arrowheads point to developed CaAMs while the arrows  
990 point to delayed CaAMs. The time point after bolting at which half of the CaAM are developed  
991 ( $t_{50}$ , in days) is indicated under the genotype.

992 (I) Kinetics of CaAM development after bolting. Development of the CaAM is indicated as the  
993 percentage of developed branches ( $\geq 3\text{mm}$ ) reported to the total number of cauline leaves  
994 ( $n \geq 11$ ).

995 (J) Kinetics of CaAM development in WT, *dpa4-2 sod7-2* and *dpa4-2 sod7-2 cuc3-105* grown 4  
996 weeks in SD and transferred to LD ( $n \geq 10$ ).

997 (K,L) Tangential optical sections of calcofluor-stained WT of *dpa4-2 sod7-2* (K) and *dpa4-2*  
998 *sod7-2 cuc3-105* (L) CaAM at 13LD. The wild-type control is shown in Fig1D

999 (M) Evolution of CaAM shape in WT and *dpa4-2 sod7-2*.

1000 (N) CaAM height and width as a function of the number of LD in WT and *dpa4-2 sod7-2*.

1001 (O) CaAM height and width as a function of the CaAM stage in WT and *dpa4-2 sod7-2*.

1002 Scale bars : (A–H) = 5 cm ; (K,L) = 100  $\mu\text{m}$

1003

1004 **Figure 3. *SOD7* and *DPA4* are required for proper *CUC2* and *CUC3* expression in CaAM**

1005 (A–H) Maximum projections of tangential optical sections of a pCUC2:erRFP and pCUC3:erCFP  
1006 reporters in WT and *dpa4-2 sod7-2* during CaAM development at dome stage (A–D) and leaf  
1007 primordia stage (E–H).

1008 (I-R) Maximum projections of tangential optical sections of whole mount *in situ hybridization*  
1009 of *CUC2* and *CUC3* transcript in WT and *dpa4-2 sod7-2* during CaAM development at dome  
1010 stage (I-L) and leaf primordia stage (M-R).

1011 Plants were grown for 4 weeks in SD conditions and then shifted to LD.

1012 Scale bars : (A-R) = 50  $\mu$ m. The dotted line corresponds to the outline of the meristems and  
1013 leaf primordia.

1014

1015 **Figure 4. *CUC2* and *CUC3* are required for delayed CaAM development in *dpa4-2 sod7-2***  
1016 **mutants**

1017 (A-J) Inflorescence of WT, simple *cuc* mutants, double mutant *dpa4-2 sod7-2* and triple  
1018 mutant *dpa4-2 sod7-2 -cuc*. Plants were grown for 5 weeks in LD. White arrowheads point to  
1019 the developed CaAMs while the arrows point to delayed CaAMs. The time point after bolting  
1020 at which half of the CaAM are developed ( $t_{50}$ , in days) is indicated under the genotype.

1021 (K-N) Kinetics of CaAM development of WT (K-N), *dpa4-2 sod7-2* (K-N), *cuc1-13* and *dpa4-2*  
1022 *sod7-2 cuc1-13* (K), *cuc1* and *dpa4-2 sod7-2 cuc1* (L), *cuc3* and *dpa4-2 sod7-2 cuc3* (M) and  
1023 *cuc3-105* and *dpa4-2 sod7-2 cuc3-105* (N) plants after bolting. Development of the CaAM is  
1024 indicated as the percentage of developed branches ( $\geq 3$ mm) reported to the total number of  
1025 cauline leaves ( $n \geq 7$ ). All data were generated in the same experiments, therefore the same  
1026 WT and *dpa4-2 sod7-2* data were used in panels K to N

1027 Scale bars : (A-J) = 5 cm

1028

1029 **Figure 5. *DPA4* and *SOD7* have overlapping expression patterns with *CUC2* and *CUC3* in the**  
1030 **boundary domain and are transiently expressed in the early AM**

1031 (A-J) Maximum projections of transverse optical sections of plants co-expressing pCUC2:erRFP  
1032 and pSOD7:GFP reporter lines. Mean fluorescence along the radial axis of CaAM at the dome  
1033 stage of the pCUC2:erRFP (E) or pSOD7:GFP (J) reporters. (n=6)

1034 (K-T) Maximum projections of transverse optical sections of plants co-expressing  
1035 pCUC3:erCFP and pDPA4:GFP reporter line. Mean fluorescence along the radial axis of CaAM  
1036 at the dome stage of the pCUC3:erCFP (O) or pDPA4:GFP (T) reporters. (n=6)

1037 CaAMs are at the (A,F,K,P) line, (B,G,L,Q) eye,(C,H,M,R) dome and late dome stage (D,I,N,S)

1038 Scale bars : (A-P) = 50  $\mu$ m; sam: shoot apical meristem; clp: cauline leaf primordium; \*: AM ;

1039 The dotted line corresponds to the outline of the cauline leaf primordium.

1040

1041 **Figure 6. Disruption of putative NGAL binding sites in *CUC3* induces ectopic *CUC3* expression**  
1042 **and delay in CaAM development.**

1043 (A-E) Inflorescence of WT, *cuc3-105* mutant, *dpa4-2 sod7-2* double mutant, pCUC3:CUC3  
1044 *cuc3-105* #1 and pCUC3-6m:CUC3-1m *cuc3-105* #13. Plants were grown for 4 weeks in SD and  
1045 then shifted to LD for 3 weeks. White arrowheads point to the developed CaAMs while the  
1046 arrows point to delayed CaAMs.

1047 (F) Secondary stem length as a function of primary length stem for WT, *cuc3-105* mutant,  
1048 *dpa4-2 sod7-2* double mutant , pCUC3:CUC3 *cuc3-105* #1 and #25 and pCUC3-6m:CUC3-1m  
1049 *cuc3-105* #13 and #14.

1050 (G) Quantification of the transcript level of *CUC3* by RT-qPCR on 10 day-old seedlings of  
1051 WT, *cuc3-105* mutant, *dpa4-2 sod7-2* double mutant, pCUC3:CUC3 *cuc3-105* #1 and #25 and  
1052 pCUC3-6m:CUC3-1m *cuc3-105* #13 and #14. Expressions were normalized using the QREF and  
1053 REFA genes. A Student's test was performed to compare the expression levels of mutants in  
1054 comparison to the wild type (p <0.05 \*; p <0.01 \*\*; p <0.001 \*\*\*).

1055 (H-I) Maximum projections of transverse optical sections of pCUC3:mCherry-N7 or pCUC3-  
1056 6m:GFP-N7 reporters in wild-type plants during CaAM formation at eye (H,I) and (J,K) dome  
1057 stage.

1058 (L-M) Mean fluorescence along the radial axis of CaAM at the dome stage of the  
1059 pCUC3:mCherry-N7 (L) or pCUC3-6m:GFP-N7 (M) reporters. (n ≥ 5)

1060 Scale bars : (A-E) = 5 cm ; (H,I) = 50 μm. sam: shoot apical meristem; clp: cauline leaf  
1061 primordium; \*: AM; the dotted line corresponds to the edge of the cauline leaf primordium.

1062

1063 **Figure 7. Stem cell specification is delayed in *dpa4-2 sod7-2* AM and floral meristems**

1064 (A-C) Expression of a pCLV3:GUS reporter in (A) *dpa4-2 sod7-2* (B) *dpa4-2 sod7-2 cuc3-105* (C)

1065 inflorescences . Plants were grown for 4 weeks in SD and then shifted to LD for 10 days. The

1066 arrows point CaAM with pCLV3:GUS expression and sam indicate the shoot apical meristem

1067 (D) Quantification of GUS positive CaAM with pCLV3:GUS expression in plants shifted to LD.

1068 (E) *CLV3* expression pattern as a function of CaAM width and height in WT and *dpa4-2 sod7-*

1069 2. “normal” is *CLV3* expressed in the apical region as shown in Fig S7A,C,D,E, while “central”

1070 is *CLV3* expression in the centre of the meristem as shown in Fig S7F.

1071 (F) *WUS* expression pattern as a function of CaAM width and height in WT and *dpa4-2 sod7-*

1072 2. “enlarged” is *WUS* expressed in the entire meristem as shown in panels J and N , “ring-

1073 shaped” is *WUS* expressed at the base of the meristem as in panel L, and “normal” is *WUS*

1074 expressed in few cells in the centre of the meristem as in panel P.

1075 (G-P) Maximum projections of transverse (G-J) and tangential (K-P) optical sections of

1076 pWUS:VENUS-NLS and pCUC3:erCFP in wild-type and *dpa4-2 sod7-2* during CaAM

1077 development. Plants were grown for 4 weeks in SD conditions and then shifted to LD.

1078 (Q-P). Maximum projections of transverse optical sections pCLV3:mCHERRY-NLS in floral

1079 meristems at stage 2 in WT and *dpa4-2 sod7-2*.

1080 (S,T) *WUS* and *CLV3* expression as a function of floral meristem stage. A Fisher's test was  
1081 performed to compare the expression levels of the mutants in comparison to the wild-type  
1082 ( $p < 0.05$  \*).

1083 Scale bars : (A-C) = 0.5cm; (G-R) = 50 $\mu$ m; sam: shoot apical meristem; clp: cauline leaf  
1084 primordium; \*: AM ; the dotted line corresponds to the outline of the cauline leaf primordium  
1085 (G-J), AM (K-P) or floral meristem (Q,R)

1086

1087

#### 1088 **LEGENDS TO THE SUPPLEMENTAL FIGURES**

1089

1090

#### 1091 **Figure 1 Supplemental. *WUS* and *CLV3* expression in CaAM and RoAM**

1092 (A-C) Maximum projections of radial optical sections of a p*WUS*:VENUS-NLS (A) and  
1093 p*CLV3*:mCHERRY-NLS (B) reporter lines and the overlay (C) during CaAM formation.

1094 (D-F) Maximum projections of radial optical sections of a p*WUS*:VENUS-NLS (D) and  
1095 p*CLV3*:mCHERRY-NLS (E) reporter lines and the overlay (F) during RoAM formation.

1096 The number of days in LD conditions is indicated.

1097 Scale bars : (A-F) = 50  $\mu$ m

1098

#### 1099 **Figure 2 Supplemental. *DPA4* and *SOD7* are required for rapid development of cauline AMs.**

1100 (A,B) Kinetics of CaAM or RoAM development of all *ngal* simple and multiple mutants after  
1101 bolting. Development of the meristems is indicated as the percentage of developed branches  
1102 ( $\geq 3$ mm) reported to the total number of cauline or rosette leaves ( $n \geq 11$ ).



1103 (C,D) SEM observations of WT and *dpa4-2 sod7-2* RoAM from leaf 7 on plants grown 4 weeks  
1104 in SD.

1105 (E) Quantification method for (F) on a maximum projection of transverse optical sections of  
1106 pCUC3:erCFP reporter in WT SAM on plants grown 4 weeks in SD. The red line represents the  
1107 width of the RoAM and the blue line the distance between the SAM and the RoAM.

1108 (F) RoAM width as a function of the distance between the same RoAM and the SAM .

1109 (G,H) Inflorescence of WT and *dpa4-3 sod7-2* double mutants. Plants were grown for 5 weeks  
1110 in LD. White arrowheads point to the developed CaAMs while the arrows point to delayed  
1111 CaAMs.

1112 Scale bars : (C,D) = 200  $\mu$ m ; (E) = 100  $\mu$ m, (G,H) = 5cm

1113

1114 **Figure 3 Supplemental. Genetic interaction between *MIR164* and *DPA4/SOD7* during CaAM**  
1115 **development and *CUC2/CUC3* mRNA quantification in *dpa4-2 sod7-2*.**

1116 (A-D) Inflorescence of WT, and *mir164a-4*, *dpa4-2 sod7-2* and *dpa4-2 sod7-2 mir164a-4*  
1117 mutants. Plants were grown for 5 weeks in LD. White arrowheads point to the developed  
1118 CaAMs while the arrows point to delayed CaAMs. The time point after bolting at which half  
1119 of the CaAM are developed ( $t_{50}$ ) is indicated under the genotype.

1120 (E) Kinetics of CaAM development after bolting. Development of the CaAM is indicated as the  
1121 percentage of developed branches ( $\geq 3$ mm) reported to the total number of cauline leaves  
1122 ( $n \geq 8$ ).

1123 (F) Inflorescence of *dpa4-2 sod7-2 cuc2g-m4* mutant. Plants were grown for 6 weeks in LD.

1124 (G) Close-up view of the inflorescence of *dpa4-2 sod7-2 cuc2g-m4* mutant on CaAM. The  
1125 plants were grown for 6 weeks in long-day-conditions. Arrows point to delayed CaAMs

1126 (H-I) Quantification of the transcript level of *CUC3* and *CUC2* by RT-qPCR in CaAM of wild-type  
1127 plants and *dpa4-2 sod7-2* double mutant grown for 5 weeks in LD. Expressions were  
1128 normalized using the QREF and REFA genes. A Student's test was performed to compare the  
1129 expression levels of the mutants in comparison to the wild-type ( $p < 0.05$  \*;  $p < 0.01$  \*\*).

1130 Scales bars : (A-D ; F-G) = 5 cm

1131

1132 **Figure 4 Supplemental. Delayed development of *dpa4-2 sod7-2* is not restored by mutations**  
1133 **in *BRC1/MAX* genes.**

1134 (A-H) Inflorescence of WT, single *max-brc1* mutants and *dpa4-2 sod7-2-max/brc1* triple  
1135 mutants. Plants were grown for 5 weeks in LD. White arrowheads point to the developed  
1136 CaAMs while arrows point to delayed CaAMs. The time point after bolting at which half of the  
1137 CaAM are developed ( $t_{50}$ ) is indicated under the genotype.

1138 (I-K) Kinetics of CaAM development of single *max-brc1* mutants and *dpa4-2 sod7-2-max/brc1*  
1139 triple mutant after bolting. Development of the CaAM is indicated as the percentage of  
1140 developed branches ( $\geq 3$ mm) reported to the total number of cauline leaves ( $n \geq 8$ ). All data  
1141 were generated in the same experiments, therefore the same WT and *dpa4-2 sod7-2* data  
1142 were used in panels I to K.

1143 Scales bars : (A-H) = 5 cm

1144

1145 **Figure 5 Supplemental. *DPA4* and *SOD7* have overlapping expression patterns with *CUC2***  
1146 **and *CUC3* in the boundary domain and are transiently expressed in the early AM**

1147 (A-H) Maximum projections of transverse optical sections of plant co-expressing  
1148 pCUC3:erCFP and pSOD7:GFP reporters.

1149 (I-P) Maximum projections of transverse optical sections of plant co-expressing pCUC2:erCFP  
1150 and pDPA4:GFP reporters  
1151 CaAMs are at the (A,E,I,M) line, (B,F,J,N) eye, (C,G,K,O) dome and late dome stage (D,H,L,P)  
1152 Scale bars : (A-P) = 50 $\mu$ m; sam: shoot apical meristem; clp: cauline leaf primordium; \*: AM ;  
1153 the dotted line corresponds to the outline of the cauline leaf primordium.

1154

1155 **Figure 6 Supplemental. Putative NGAL binding sites in *CUC3* and pCUC3/pCUC3-6m reporter**  
1156 **expression in CaAM.**

1157 (A) Diagram of *CUC3* promoter and CDS with all the putative *NGAL* binding sites identified  
1158 (Swaminathan et al., 2008 ; Zhang et al., 2015).

1159 A focus on the sequence of BS1 is shown. A and A-m indicate the wild-type probe and the  
1160 mutated probe used in the EMSA, respectively.

1161 (B) EMSA experiments showed that SOD7 directly binds to the promoter of *CUC3*. The biotin-  
1162 labeled probe A and MBP-SOD7 formed a DNA-protein complex (lane 2), but the mutated  
1163 probe A-m and MBP-SOD7 did not (lane 9). The biotin-labeled probe A and MBP did not form  
1164 a DNA-protein complex (lane 1). The retarded DNA-protein complex was reduced by the  
1165 competition using the unlabeled probe A (lane 3 to 5), but not reduced by the competition  
1166 using the unlabeled mutated probe A-m (lane 6 to 8).

1167 (C-D) Maximum projections of transverse optical sections of pCUC3:mCherry-N7 or pCUC3-  
1168 6m:GFP-N7 reporters in wild-type plants during CaAM formation at leaf primordium stage.

1169 Scale bars : (B-C) = 50 $\mu$ m ; the dotted line corresponds to the outline of the cauline meristem  
1170 and leaf primordia.

1171 .

1172

1173 **Figure 7 Supplemental. *CLV3* and *WUS* expression patterns in CaAMs.**

1174 (A-D) Maximum projections of tangential optical sections of whole mount *in situ hybridization*  
1175 of *CLV3* transcript in WT and *dpa4-2 sod7-2* in CaAMs at dome stage (E-F) and leaf primordium  
1176 stage (G-H).

1177 (E,F) Maximum projections of tangential optical sections of the p*CLV3*:mCHERRY-NLS reporter  
1178 during CaAM development at dome stage.

1179 (G-I) Maximum projections of optical sections of whole mount *in situ hybridization* of *WUS*  
1180 transcript in CaAMs at dome stage.

1181 Scale bars : 50µm

1182

1183 **Figure 8 Supplemental. *WUS* and *CLV3* activation are delayed in *dpa4-2 sod7-2* floral  
1184 meristems**

1185 (A,B) *WUS* and *CLV3* expression as a function of floral meristem size

Nicolas et al., Figure 1

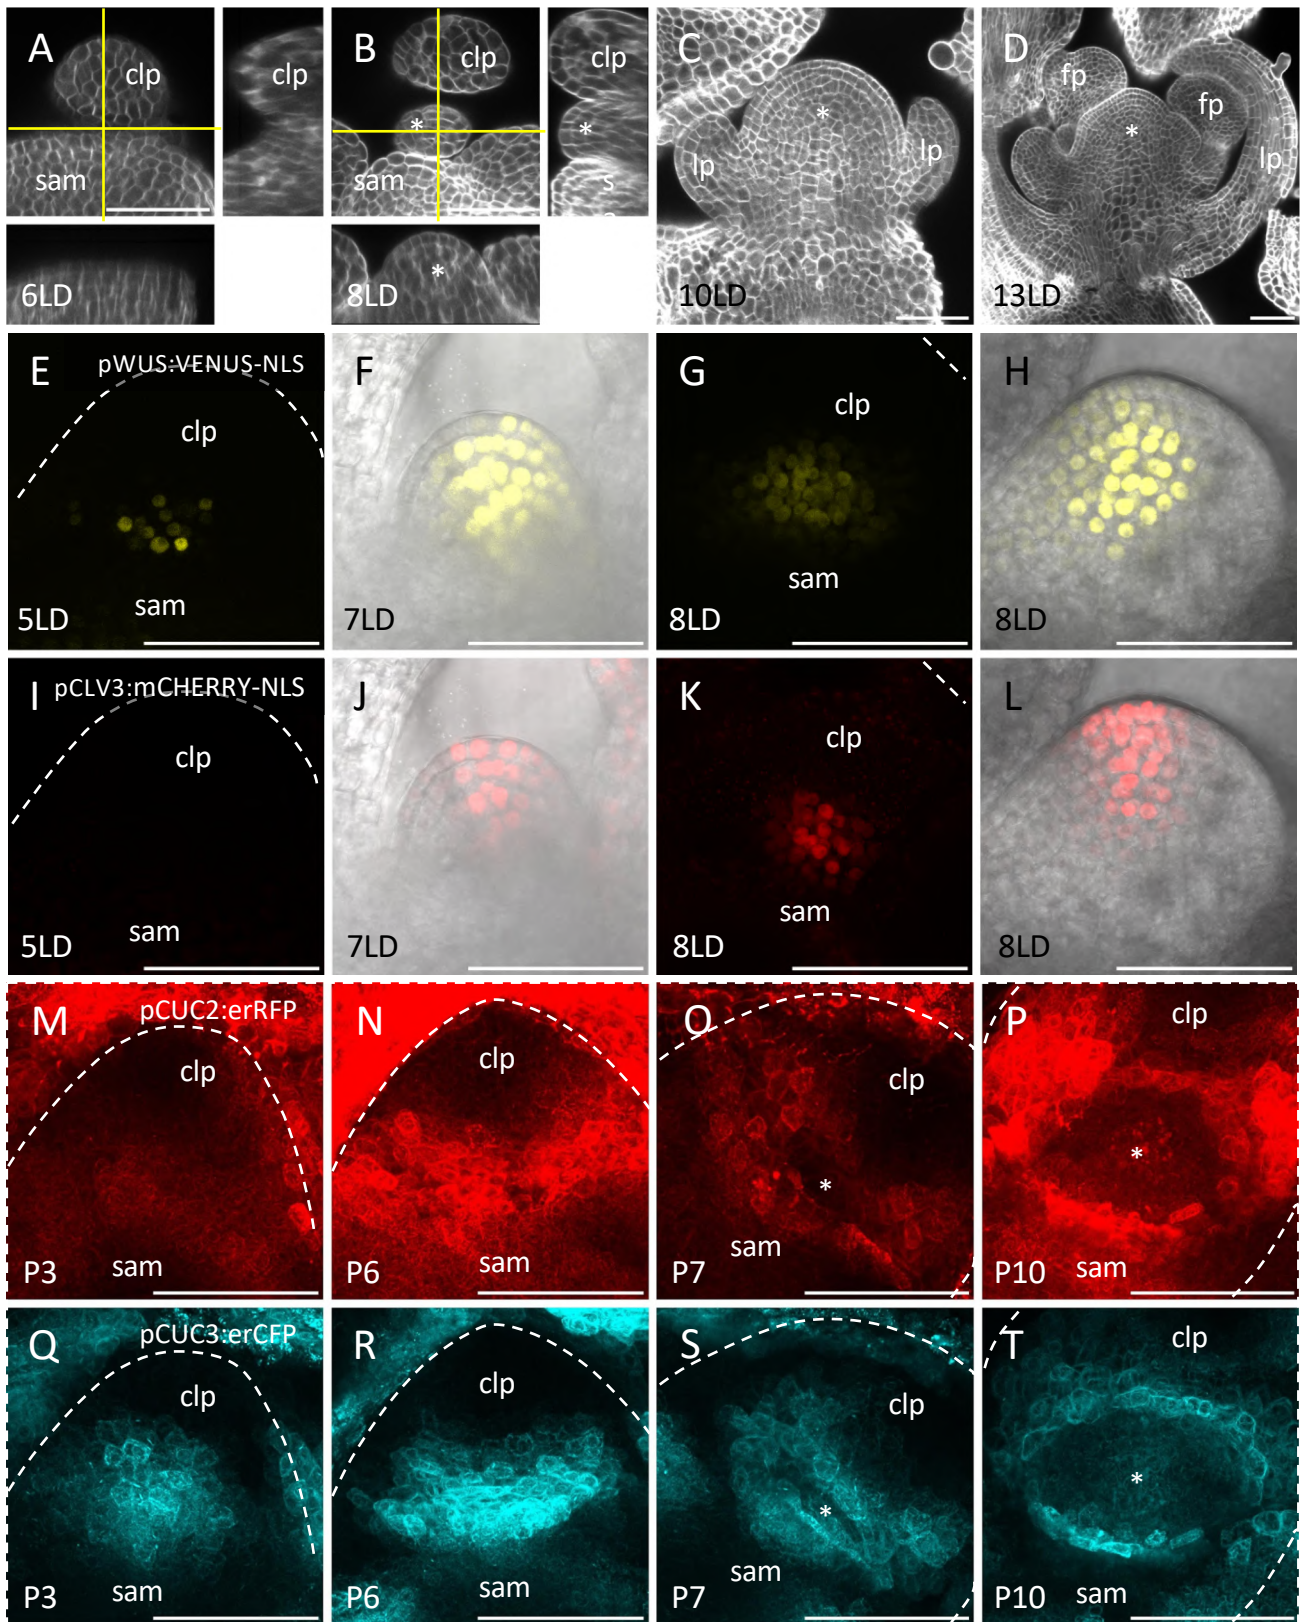

**Figure 1. Rapid morphological changes and dynamic gene expression accompany CaAM formation.**

(A-D) Optical sections of calcofluor-stained axillary regions of wild-type following SD to LD transition. (A-B) Main panel: transverse optical section (with respect to the main stem axis), lower panel: reconstructed optical tangential section, right panel: reconstructed optical radial sections. Yellow lines mark the position of the tangential and radial sections. (C-D) Optical tangential sections. The number of days in LD condition is indicated.

(E-L) Maximum projections of transverse (E,G,I,K) and tangential (F,H,J,L) optical sections of a pWUS:VENUS-NLS (E-H) and pCLV3:mCHERRY-NLS (I-L) reporter line during CaAM formation. (F,J,H and L) are a merge between reporter fluorescence and transmitted light. The number of days in LD condition is indicated.

(M-T) Maximum projections of transverse optical sections of a pCUC2:erRFP (M-P) and pCUC3:erCFP (Q-T) reporter line during CaAM formation. Positions are numbered according to the rank of the primordium. Primordium number is indicated.

Scale bars = 50µm; sam: shoot apical meristem; clp: cauline leaf primordium; \*: AM; lp: leaf primordium formed by the AM, fp: flower primordium formed by the AM. The dotted line corresponds to the outline of the cauline leaf primordium.

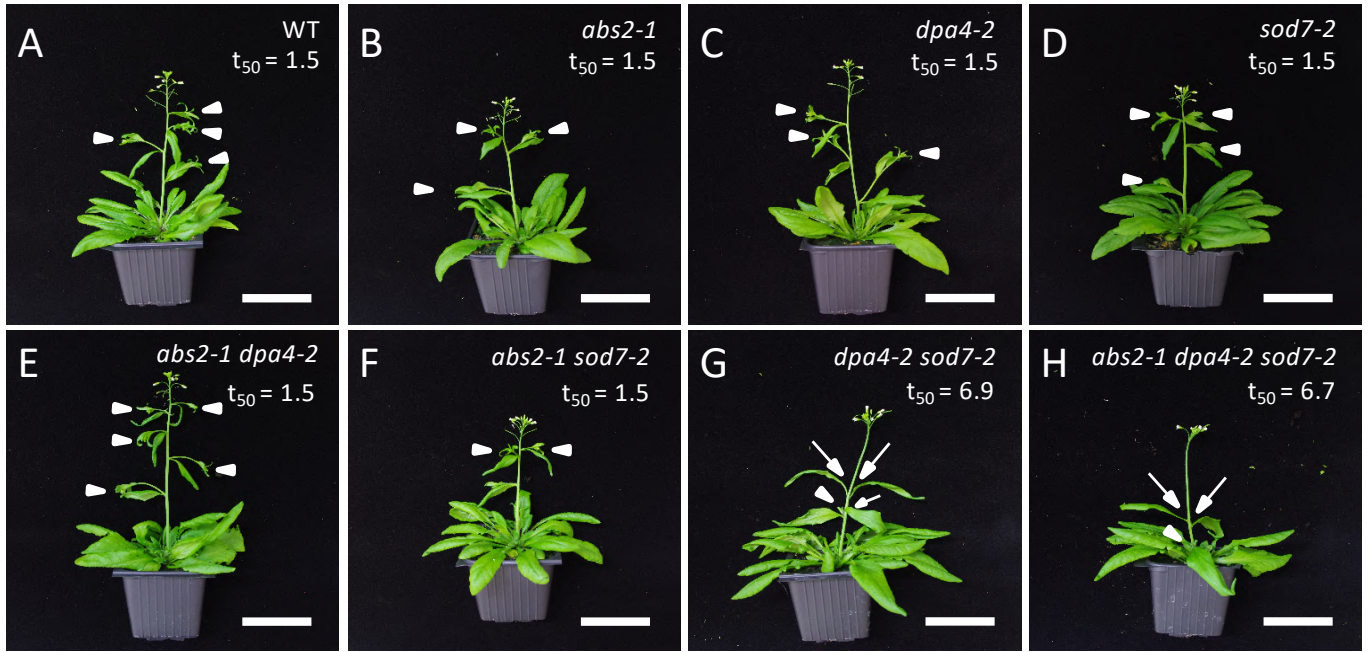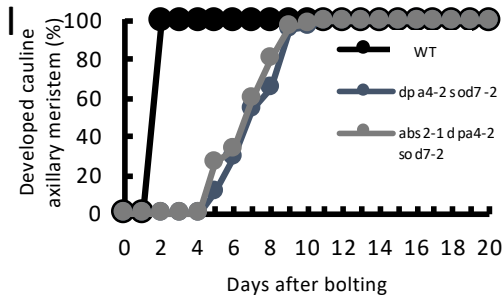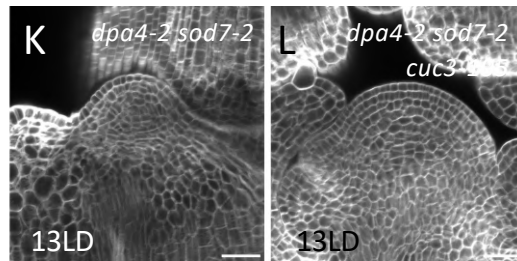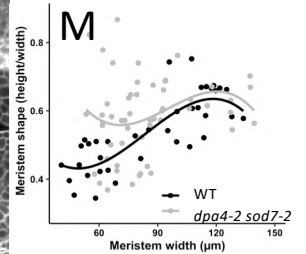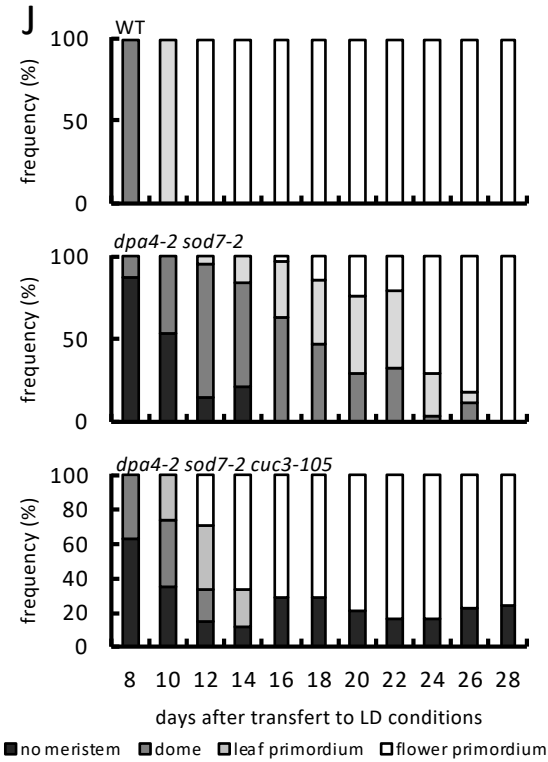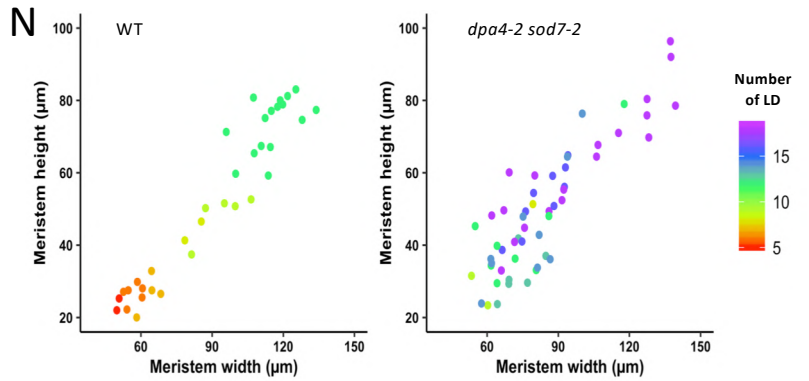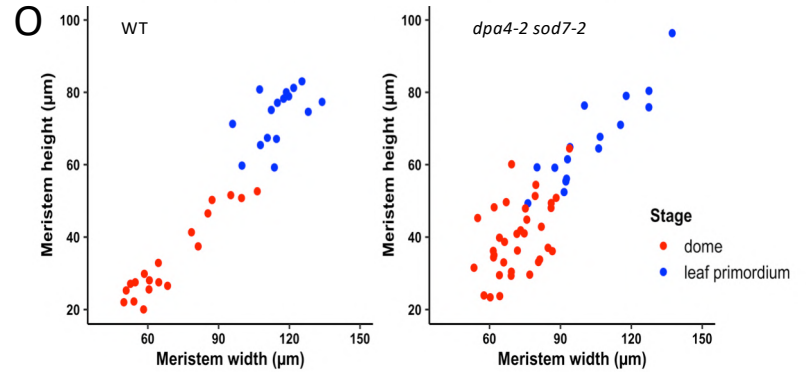

**Figure 2. *DPA4* and *SOD7* are required for rapid development of cauline AMs.**

(A–H) Inflorescence of WT, simple, double and triple *ngal* mutants. Plants were grown for 5 weeks in long-day conditions. White arrowheads point to developed CaAMs while the arrows point to delayed CaAMs. The time point after bolting at which half of the CaAM are developed ( $t_{50}$ , in days) is indicated under the genotype.

(I) Kinetics of CaAM development after bolting. Development of the CaAM is indicated as the percentage of developed branches ( $\geq 3$ mm) reported to the total number of cauline leaves ( $n \geq 11$ ).

(J) Kinetics of CaAM development in WT, *dpa4-2 sod7-2* and *dpa4-2 sod7-2 cuc3-105* grown 4 weeks in SD and transferred to LD ( $n \geq 10$ ).

(K,L) Tangential optical sections of calcofluor-stained WT of *dpa4-2 sod7-2* (K) and *dpa4-2 sod7-2 cuc3-105* (L) CaAM at 13LD. The wild-type control is shown in Fig1D

(M) Evolution of CaAM shape in WT and *dpa4-2 sod7-2*.

(N) CaAM height and width as a function of the number of LD in WT and *dpa4-2 sod7-2*.

(O) CaAM height and width as a function of the CaAM stage in WT and *dpa4-2 sod7-2*.

Scale bars : (A–H) = 5 cm ; (K,L) = 100  $\mu$ m



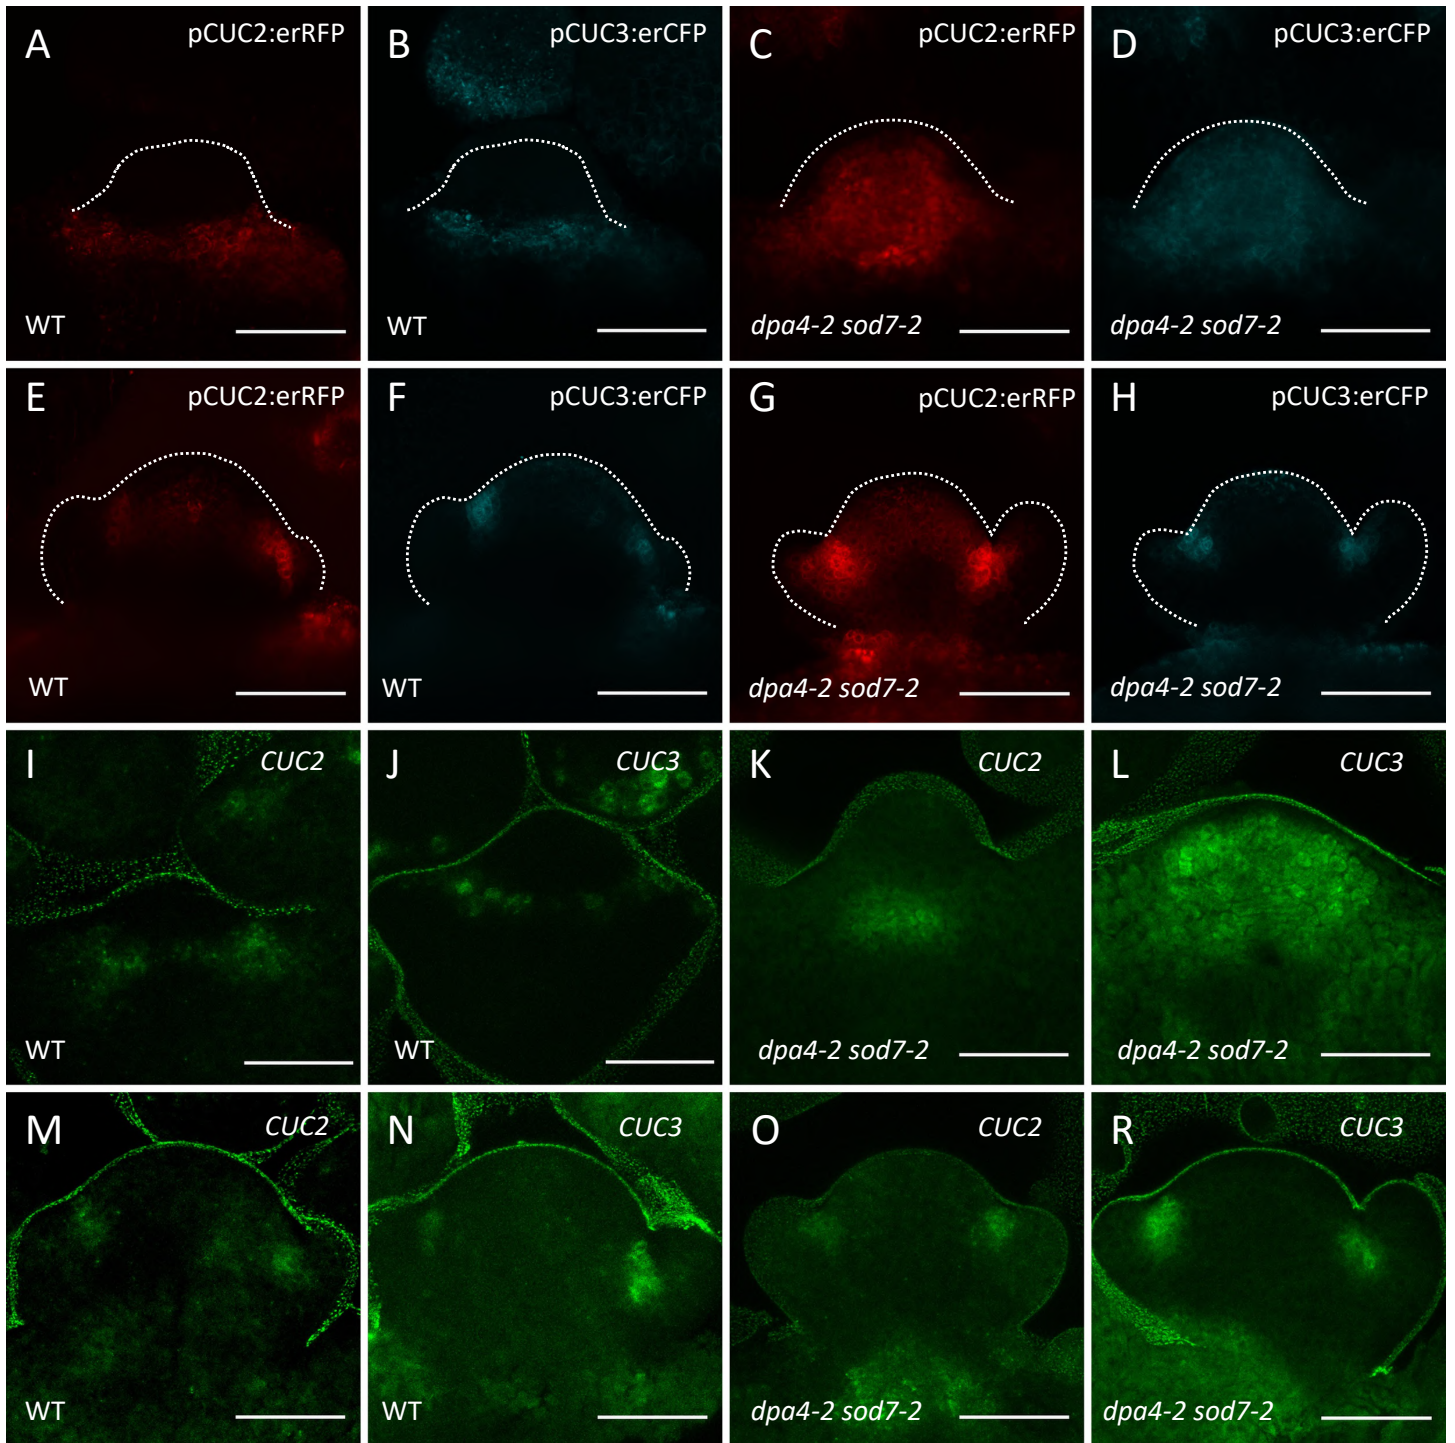

**Figure 3. *SOD7* and *DPA4* are required for proper *CUC2* and *CUC3* expression in CaAM**

(A-H) Maximum projections of tangential optical sections of a pCUC2:erRFP and pCUC3:erCFP reporters in WT and *dpa4-2 sod7-2* during CaAM development at dome stage (A-D) and leaf primordia stage (E-H).

(I-R) Maximum projections of tangential optical sections of whole mount *in situ hybridization* of *CUC2* and *CUC3* transcript in WT and *dpa4-2 sod7-2* during CaAM development at dome stage (I-L) and leaf primordia stage (M-R).

Plants were grown for 4 weeks in SD conditions and then shifted to LD.

Scale bars : (A-R) = 50  $\mu$ m. The dotted line corresponds to the outline of the meristems and leaf primordia.

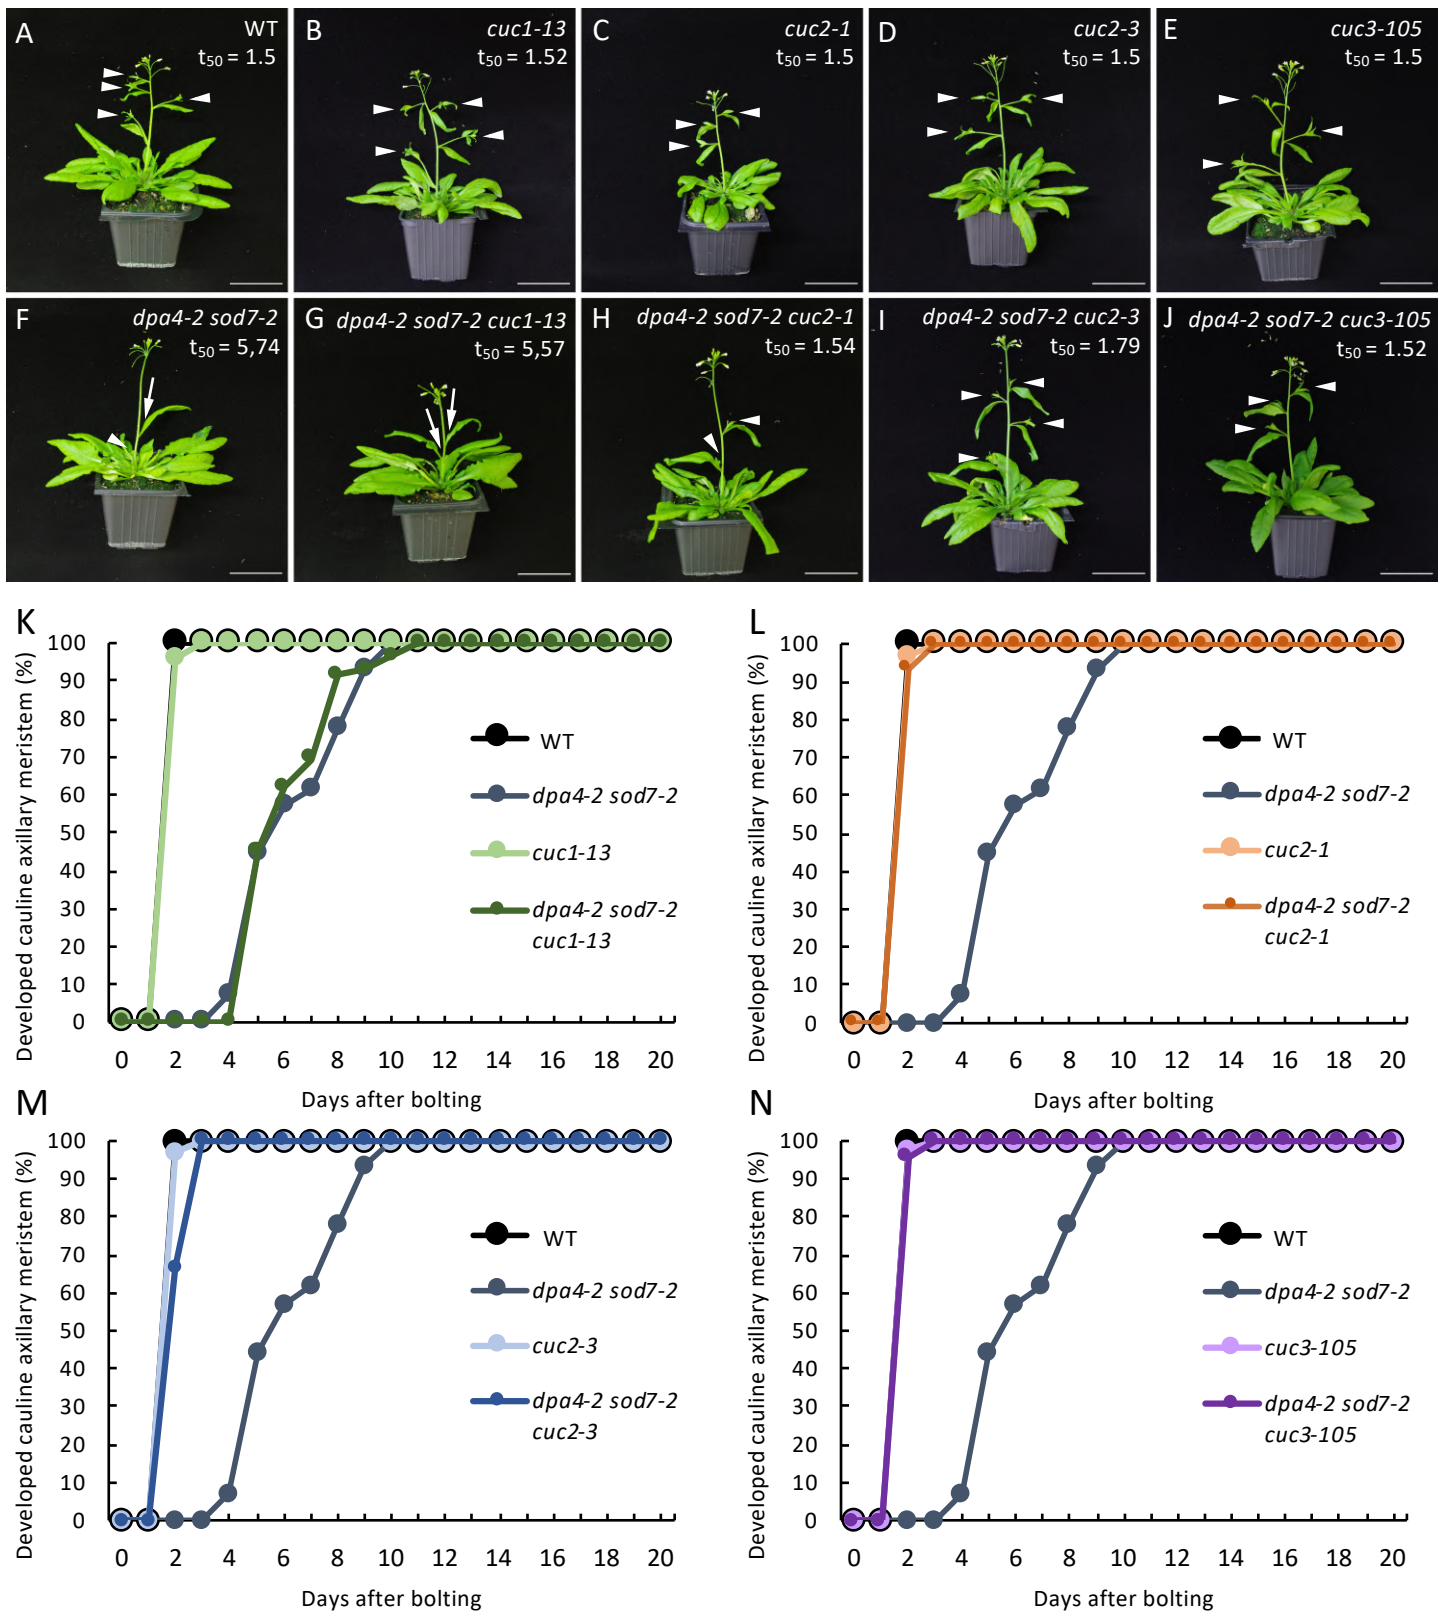

**Figure 4. *CUC2* and *CUC3* are required for delayed CaAM development in *dpa4-2 sod7-2* mutants**

(A-J) Inflorescence of WT, simple *cuc* mutants, double mutant *dpa4-2 sod7-2* and triple mutant *dpa4-2 sod7-2 -cuc*. Plants were grown for 5 weeks in LD. White arrowheads point to the developed CaAMs while the arrows point to delayed CaAMs. The time point after bolting at which half of the CaAM are developed ( $t_{50}$ , in days) is indicated under the genotype.

(K-N) Kinetics of CaAM development of WT (K-N), *dpa4-2 sod7-2* (K-N), *cuc1-13* and *dpa4-2 sod7-2 cuc1-13* (K), *cuc1* and *dpa4-2 sod7-2 cuc1* (L), *cuc3* and *dpa4-2 sod7-2 cuc3* (M) and *cuc3-105* and *dpa4-2 sod7-2 cuc3-105* (N) plants after bolting. Development of the CaAM is indicated as the percentage of developed branches ( $\geq 3$ mm) reported to the total number of cauline leaves ( $n \geq 7$ ). All data were generated in the same experiments, therefore the same WT and *dpa4-2 sod7-2* data were used in panels K to N

Scale bars : (A-J) = 5 cm

# Nicolas et al., Figure 5

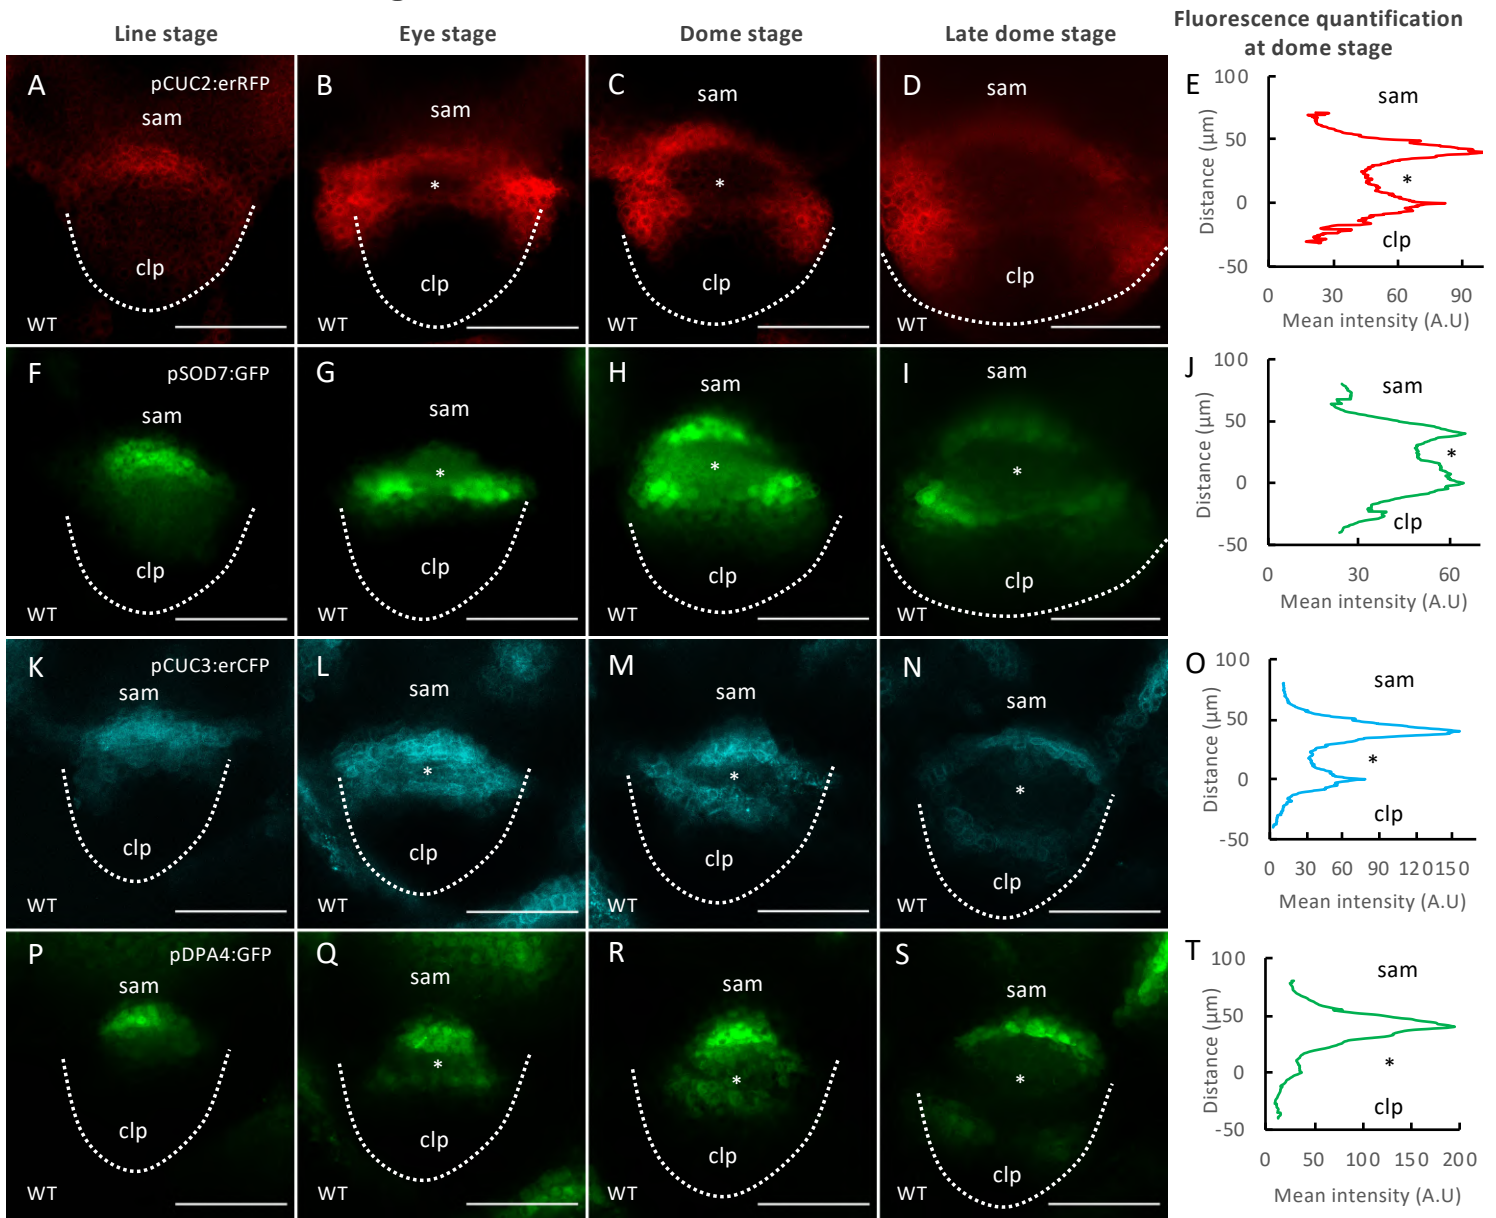

**Figure 5. *DPA4* and *SOD7* have overlapping expression patterns with *CUC2* and *CUC3* in the boundary domain and are transiently expressed in the early AM**

(A-J) Maximum projections of transverse optical sections of plants co-expressing pCUC2:erRFP and pSOD7:GFP reporter lines. Mean fluorescence along the radial axis of CaAM at the dome stage of the pCUC2:erRFP (E) or pSOD7:GFP (J) reporters. (n=6)

(K-T) Maximum projections of transverse optical sections of plants co-expressing pCUC3:erCFP and pDPA4:GFP reporter line. Mean fluorescence along the radial axis of CaAM at the dome stage of the pCUC3:erCFP (O) or pDPA4:GFP (T) reporters. (n=6)

CaAMs are at the (A,F,K,P) line, (B,G,L,Q) eye, (C,H,M,R) dome and late dome stage (D,I,N,S)

Scale bars : (A-P) = 50  $\mu\text{m}$ ; sam: shoot apical meristem; clp: cauline leaf primordium; \*: AM ; The dotted line corresponds to the outline of the cauline leaf primordium.

Nicolas et al., Figure 6

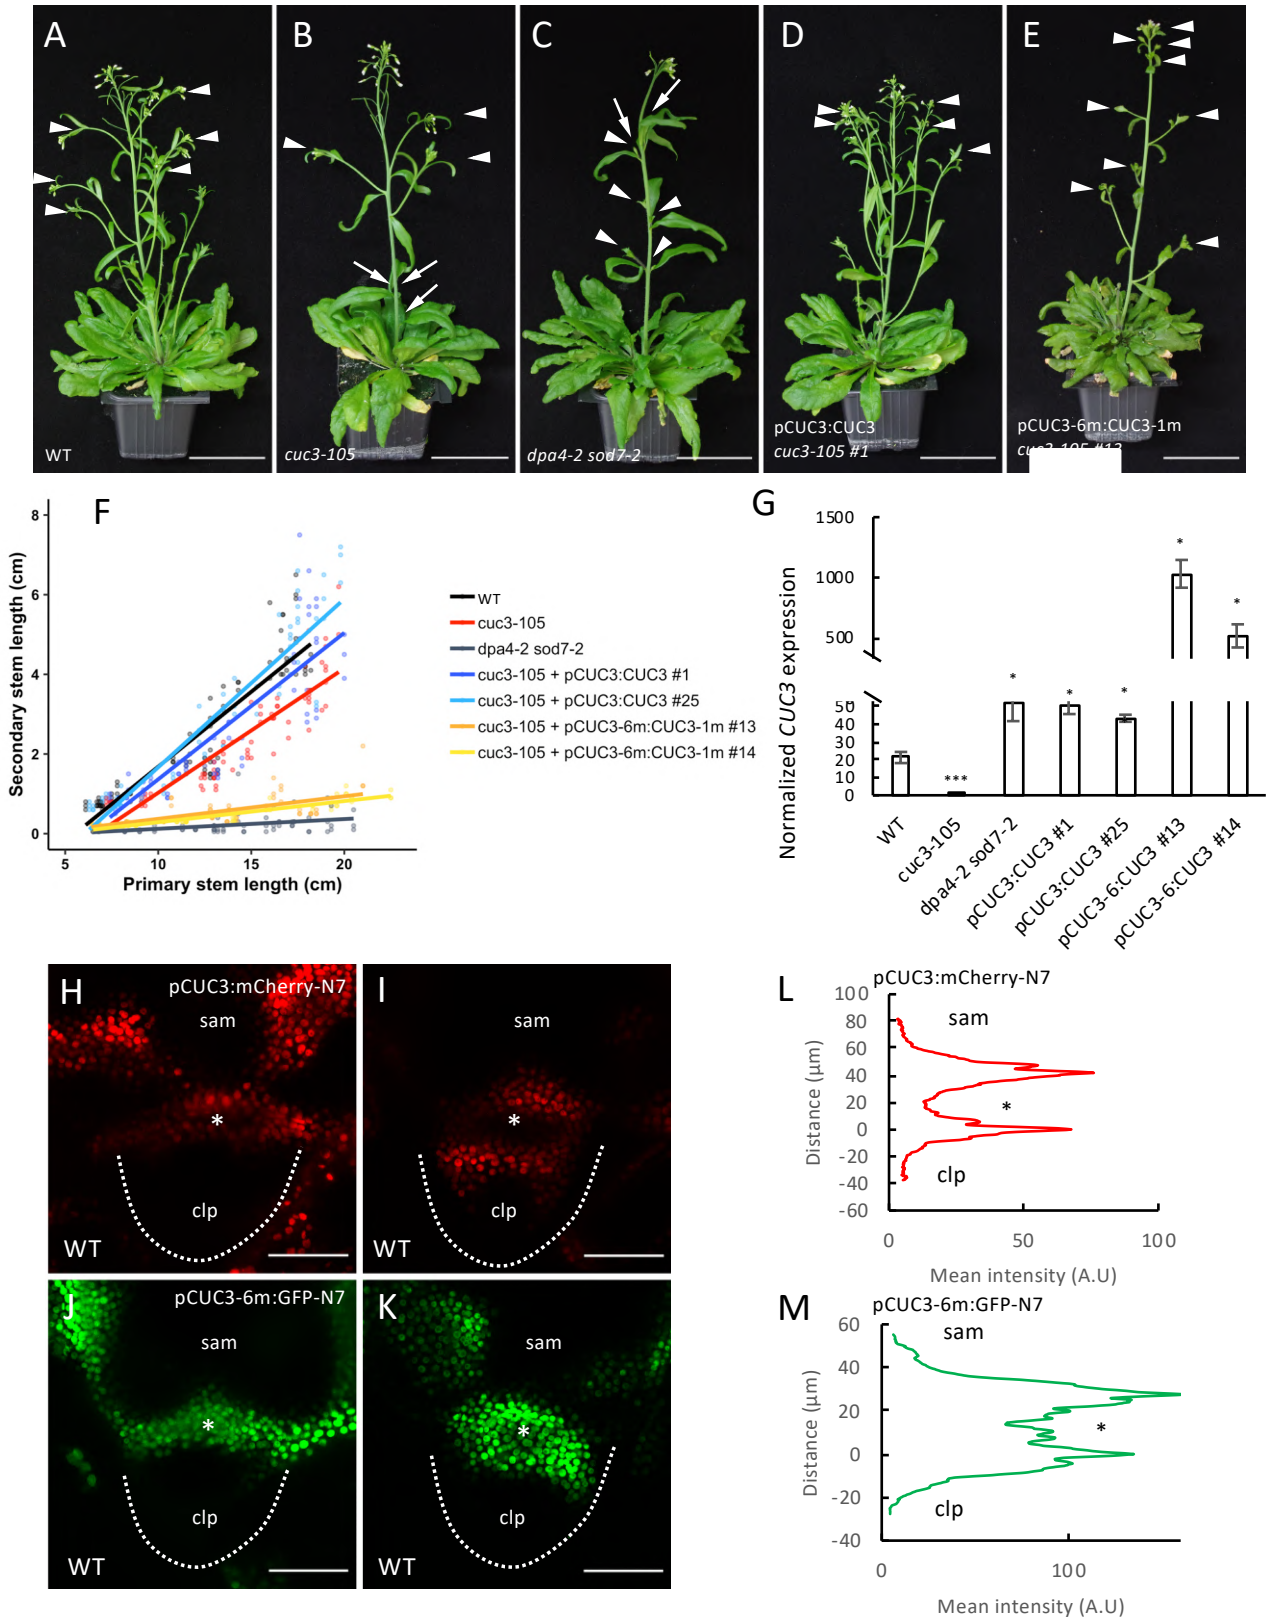

**Figure 6. Disruption of putative NGAL binding sites in *CUC3* induces ectopic *CUC3* expression and delay in CaAM development.**

(A-E) Inflorescence of WT, *cuc3-105* mutant, *dpa4-2 sod7-2* double mutant, pCUC3:*CUC3 cuc3-105* #1 and pCUC3-6m:*CUC3-1m cuc3-105* #13. Plants were grown for 4 weeks in SD and then shifted to LD for 3 weeks. White arrowheads point to the developed CaAMs while the arrows point to delayed CaAMs.

(F) Secondary stem length as a function of primary length stem for WT, *cuc3-105* mutant, *dpa4-2 sod7-2* double mutant, pCUC3:*CUC3 cuc3-105* #1 and #25 and pCUC3-6m:*CUC3-1m cuc3-105* #13 and #14.

(G) Quantification of the transcript level of *CUC3* by RT-qPCR on 10 day-old seedlings of WT, *cuc3-105* mutant, *dpa4-2 sod7-2* double mutant, pCUC3:*CUC3 cuc3-105* #1 and #25 and pCUC3-6m:*CUC3-1m cuc3-105* #13 and #14. Expressions were normalized using the QREF and REFA genes. A Student's test was performed to compare the expression levels of mutants in comparison to the wild type ( $p < 0.05$  \*;  $p < 0.01$  \*\*;  $p < 0.001$  \*\*\*).

(H-I) Maximum projections of transverse optical sections of pCUC3:mCherry-N7 or pCUC3-6m:GFP-N7 reporters in wild-type plants during CaAM formation at eye (H,I) and (J,K) dome stage.

(L-M) Mean fluorescence along the radial axis of CaAM at the dome stage of the pCUC3:mCherry-N7 (L) or pCUC3-6m:GFP-N7 (M) reporters. ( $n \geq 5$ )

Scale bars : (A-E) = 5 cm ; (H,I) = 50  $\mu$ m. sam: shoot apical meristem; clp: cauline leaf primordium; \*: AM; the dotted line corresponds to the edge of the cauline leaf primordium.

# Nicolas et al., Figure 7

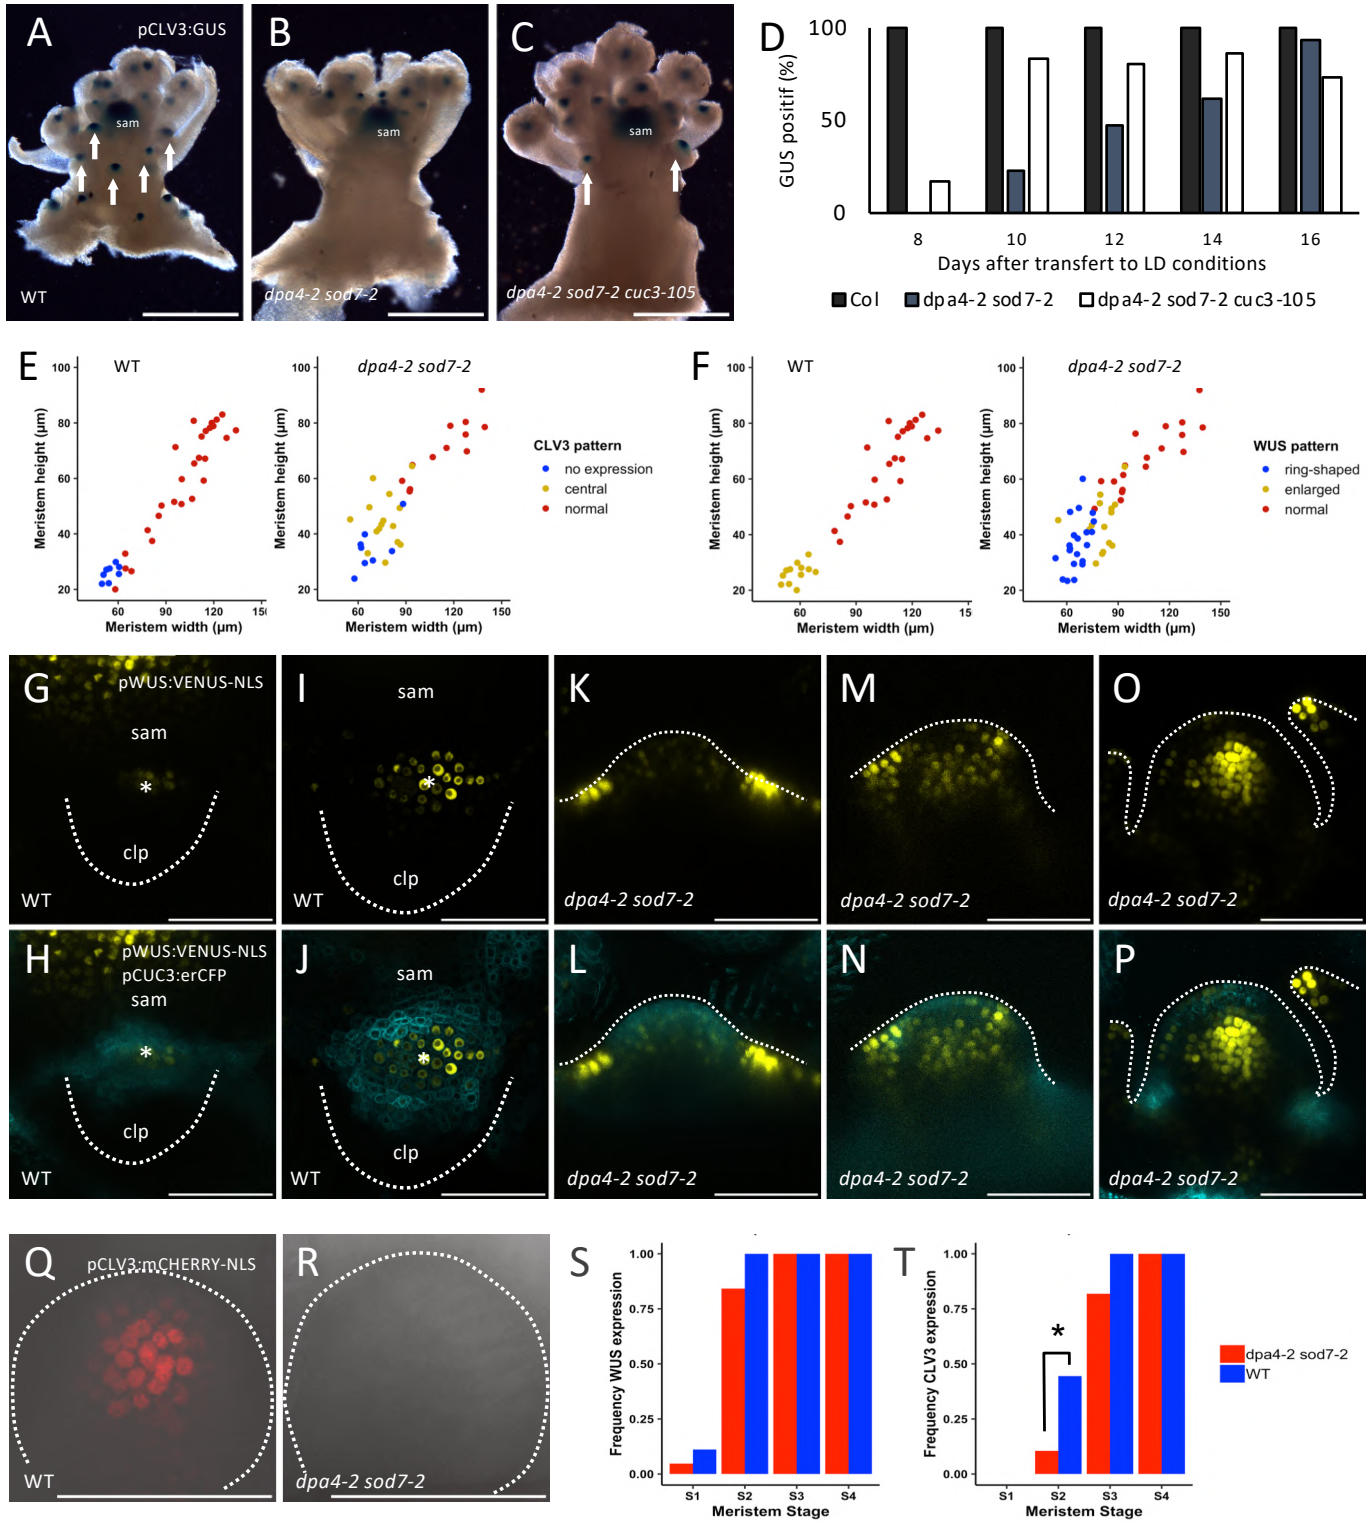

**Figure 7. Stem cell specification is delayed in *dpa4-2 sod7-2* AM and floral meristems**

(A-C) Expression of a pCLV3:GUS reporter in (A) *dpa4-2 sod7-2* (B) *dpa4-2 sod7-2 cuc3-105* (C) inflorescences. Plants were grown for 4 weeks in SD and then shifted to LD for 10 days. The arrows point CaAM with pCLV3:GUS expression and sam indicate the shoot apical meristem

(D) Quantification of GUS positive CaAM with pCLV3:GUS expression in plants shifted to LD.

(E) *CLV3* expression pattern as a function of CaAM width and height in WT and *dpa4-2 sod7-2*. “normal” is *CLV3* expressed in the apical region as shown in Fig S7A,C,D,E, while “central” is *CLV3* expression in the centre of the meristem as shown in Fig S7F.

(F) *WUS* expression pattern as a function of CaAM width and height in WT and *dpa4-2 sod7-2*. “enlarged” is *WUS* expressed in the entire meristem as shown in panels J and N, “ring-shaped” is *WUS* expressed at the base of the meristem as in panel L, and “normal” is *WUS* expressed in few cells in the centre of the meristem as in panel P.

(G-P) Maximum projections of transverse (G-J) and tangential (K-P) optical sections of pWUS:VENUS-NLS and pCUC3:erCFP in wild-type and *dpa4-2 sod7-2* during CaAM development. Plants were grown for 4 weeks in SD conditions and then shifted to LD.

(Q-P). Maximum projections of transverse optical sections pCLV3:mCHERRY-NLS in floral meristems at stage 2 in WT and *dpa4-2 sod7-2*.

(S,T) *WUS* and *CLV3* expression as a function of floral meristem stage. A Fisher’s test was performed to compare the expression levels of the mutants in comparison to the wild-type ( $p < 0.05$  \*).

Scale bars : (A-C) = 0.5cm; (G-R) = 50 $\mu$ m; sam: shoot apical meristem; clp: cauline leaf primordium; \*: AM ; the dotted line corresponds to the outline of the cauline leaf primordium (G-J), AM (K-P) or floral meristem (Q,R)
